# Supplementary material for: A deep learning framework to predict binding preference of RNA constituents on protein surface
Source: PubMed Central journal article supplement (PMC6821705; doi:10.1038/s41467-019-12920-0), 2019-10-30
Supplement: 41467_2019_12920_MOESM1_ESM.pdf [file 41467_2019_12920_MOESM1_ESM.pdf]

## **Supplementary Information**

**A Deep Learning Framework to Predict Binding Preference of RNA**

**Constituents on Protein Surface**

**Lam et al.**

## Supplementary Methods

**Selection of Protein Data Bank Data For Cross-Validation.** RNA-protein complexes were taken from a snapshot of the RCSB Protein Data Bank dated 01/01/2017. Structures with resolution poorer than 3 Å were discarded. Ribosome and ribozymes structures were excluded as most of the RNA-protein interactions were maintained by disproportionately extensive RNA-RNA interactions rarely found in other systems. PDB entries with the following traits were also discarded:

- RNA bound to short protein chain typically less than 30 amino acids in length.
- Proteins bound to Short RNA chains typically less than 4 nucleotides in length.
- Entries deposited but without a peer-reviewed article.
- Double stranded RNA that only contacts protein on their backbones
- Protein in contact with chemically modified bases e.g. 5-iodouracil (5IU) and Pseudouridine (PSU) as they create inaccurate false positive for Non-sites

After the removal of all these PDB entries, 483 redundant RNA-protein complexes remains in total, which are then further processed to remove redundancies as described in the main text to constitute a dataset of non-redundant 158 ribonucleoprotein structures. A list of PDB Entries, redundant and non-redundant, is produced in the following paragraphs. In Supplementary Figure 1, a graph that describes clusters of PDB entries sharing at least 1 chain of  $\geq 90\%$  sequence homolog is produced. In Supplementary Figure 2, a line graph describing compositions of these cluster at different percentage of BLASTClust percentage is introduced. In Supplementary Figure 3, a bar chart describing the count of site (referring to class label 'A','U','C','G','P','R') and non-site data points for each PDB entry in the non-redundant dataset is introduced.

A list of redundant PDB entries:

['3hsb', '2y8w', '3ovs', '5jc3', '3ovb', '4ngg', '1g59', '4f3t', '4nh6', '3og8', '2jlx', '2jly', '2jlz', '2jlv', '2jlw', '2atw', '4jvy', '3mdg', '4kq0', '1yty', '5sup', '4jyz', '1n77', '2err', '2xzl', '4olb', '3bsx', '2xzo', '1n78', '1j1u', '4k4w', '4k4u', '4k4s', '1m5o', '4k4z', '4k4y', '4k4x', '1k8w', '5f9f', '3ova', '3hju', '1m5p', '3rer', '3o3i', '1m5v', '3qg9', '1utf', '2mfc', '2mfe', '4alp', '5g4v', '2mff', '4hot', '4hos', '4hor', '3ahu', '3v6y', '2cv2', '2cv1', '2cv0', '3zju', '5eew', '2g4b', '5jaj', '3h5x', '3zjt', '3h5y', '5eey', '5eex', '5eez', '4al5', '3zjv', '5h3u', '5a0t', '5i9h', '2mfl', '2mf0', '2nug', '2nuf', '2nue', '3qgc', '5e3h', '3ol8', '5tf6', '3ex7', '3ol9', '3ol7', '4j1g', '5elr', '2xgj', '5f8j', '4kze', '4kzd', '1wmg', '3koa', '2jlu', '5elx', '5kal', '1utv', '4aq7', '3pey', '4wzq', '1n38', '5i9d', '1utd', '5i9f', '2ru3', '1n35', '1o0c', '4qqb', '1b2m', '3o7v', '3rw6', '3sqx', '3zgz', '2vpl', '3sqw', '1zbn', '2ab4', '4pkd', '1wrq', '5ex7', '2zh2', '2zh3', '2zh4', '3l26', '2zh6', '2zh8', '2zh9', '3egz', '4ktg', '2ykg', '2x1f', '1b23', '5js1', '2ec0', '3vnn', '1fxl', '2zha', '5ef0', '5ef1', '5ef2', '5ef3', '4tz0', '5fj4', '4bs2', '4oog', '4j39', '5jch', '1ffy', '2zh1', '1hq1', '4y91', '2zh5', '3bsb', '5bym', '4qoz', '5aor', '5det', '4pei', '4peh', '4yvj', '5id6', '1i9f', '4wtk', '4wtj', '4wti', '4wtm', '4wtl', '4wtc', '4wta', '5tsn', '4wtf', '4wte', '4wtd', '2zm5', '3olb', '2cjk', '2y8y', '2py9', '3ie1', '4f02', '3vjr', '4yco', '4yep', '5t8y', '3ol6', '2hvy', '4ola', '5e08', '3nmu', '1o0b', '3iev', '5amr', '2x1a', '3nma', '2ozb', '4m7a', '4m7d', '3qsu', '4k4t', '3nvi', '3klv', '2q66', '3bt7', '5ah5', '1qu3', '1qu2', '5f8m', '5f8l', '5f8n', '5f8i', '5f8h', '5f8g', '1exy', '5hab', '1si3', '5i9g', '1rc7', '5dno', '2jpp', '5h1k', '1ivs', '2yjj', '3adl', '3q0p', '3tmi', '4c8z', '5kla', '5guh', '3ks8', '4nh5', '4q9q', '5g4u', '4z0c', '2asb', '2mfg', '3mqk', '1urn', '1g2e', '4zlr', '2zi0', '1m8v', '1m8w', '2mfh', '1m8x', '1m8y', '2qux', '1yz9', '3mdi', '3sn2', '5jc7', '1zh5', '5ddr', '5ddq', '5ddp', '4nh3', '4cqn', '3lrm', '5ho4', '5udj', '5udk', '3lrr', '2db3', '5els', '5jji', '2uwm', '5elt', '4fvu', '4d26', '4d25', '3snp', '4pmw', '4knq', '5jcf', '2xs7', '4qpx', '2xs5', '3k49', '2xs2', '3gib', '2adc', '3mum', '4arc', '3siu', '5f5h', '1sds', '3l25', '4ohz', '5lta', '4kxt', '4c4w', '5jxs', '5m3h', '1b7f', '4m2z', '3avx', '3avy', '3avw', '3avt', '4gv6', '1exd', '3nl0', '4z4f', '4z4g', '5eev', '4as1', '4z4h', '2rra', '2lec', '3lww', '3lwp', '3lwq', '3lwr', '3lwo', '5t7b', '1wpu', '3q0q', '3q0r', '3q0s', '3q0l', '3q0m', '3q0o', '4x2b', '1c9s', '1rlg', '4al6', '4oi0', '4oi1', '2r7v', '4zt0', '2r7r', '2r7x', '4ei3', '1zl3', '4ei1', '5ev2', '5ev1', '3zd7', '3zd6', '3avu', '1aud', '2y9h', '5i4a', '4z4d', '4z4e', '4iqx', '1n1h', '4z4c', '1gax', '3kmq', '2z xu', '3kms', '4b3g', '4x4n', '4l8r', '3i5y', '3i5x', '2ez6', '3qgb', '484d', '4wrt', '4z4i', '2j0s', '2e9t', '5jbg', '2e9r', '5gxh', '5gxi', '4gv3', '2hyi', '4jgn', '1yyw', '4gv9', '2leb', '5mfx', '5a0v', '5ev4', '1yyk', '3hax', '1yyo', '5ev3', '5jb2',

'4jng', '4x4t', '4bw0', '3aev', '4jnx', '3v71', '3v74', '4wtg', '5t16', '3ncu', '4w5o', '4hxx', '5uj2', '2dvi', '3i62', '4oav', '5gjb', '3i61', '5eeu', '3ice', '4ngd', '4ngc', '4ngb', '3q0n', '4n0t', '5v7c', '1tfw', '1gtn', '3k5y', '3k5z', '1gtf', '3k5q', '3k64', '2dxi', '3pew', '4qvd', '4qvc', '3irw', '5bz5', '1r9f', '1knz', '4xww', '4kre', '3boy', '5ki6', '2rfk', '3ouy', '3mxh', '3kna', '2yh1', '1cvj', '4ari', '5bud', '4w5r', '3ud4', '4w5t', '4ohy', '4jk0', '4w5n', '3ucu', '2dra', '2drb', '3ucz', '5h11', '5bzb', '5bzu', '1lng', '2v3c', '4qil', '3gpq', '4e78', '4j5v', '4x4u', '4x4v', '4oe1', '4ht8', '4ht9', '2voo', '2von', '2vod', '4m59', '2dr8', '2dr9', '5bz1', '3k61', '3k62', '4wzm', '2vop', '2dr5', '2dr7', '4yoe', '4g9z', '3bx2', '4tyw', '5k77', '5en1', '4bpb', '5eim', '1kq2', '4tyy']

A list of non-redundant PDB entries:

['3hsb', '2jlv', '4jvy', '4kq0', '5sup', '2err', '2xzl', '2xzo', '1j1u', '4k4z', '3hgw', '3o3i', '4alp', '4hos', '2g4b', '5jaj', '5a0t', '3qgc', '3ex7', '4j1g', '5elr', '2xgj', '5f8j', '5kal', '2ru3', '1o0c', '1b2m', '3rw6', '3sqx', '2vpl', '3sqw', '2ab4', '4pkd', '5ex7', '3l26', '2zh6', '3egz', '1b23', '3vnn', '4bs2', '4oog', '1ffy', '1hq1', '4y91', '5bym', '4qoz', '5aor', '5det', '4yvj', '5id6', '2zm5', '2cjk', '2y8y', '2py9', '3ie1', '4f02', '3vjr', '4ycp', '5t8y', '3ol6', '4ola', '3iev', '5amr', '2x1a', '3nma', '4m7a', '3qsu', '2q66', '3bt7', '5ah5', '5hab', '1si3', '5i9g', '5dno', '3adl', '4c8z', '5kla', '5guh', '3ks8', '4q9q', '4z0c', '2asb', '2mfg', '1g2e', '2zi0', '1m8v', '2qux', '3mdi', '3sn2', '4nh3', '5ho4', '5udj', '2db3', '5els', '5jji', '2uwm', '5elt', '4fvu', '4d25', '4pmw', '5jcf', '2xs7', '4qpx', '3k49', '2xs2', '3gib', '2adc', '3siu', '5f5h', '1sds', '5lta', '4kxt', '5m3h', '1b7f', '4gv6', '5eev', '2rra', '2lec', '1wpu', '4al6', '4zt0', '2r7r', '1zl3', '5ev1', '5i4a', '1n1h', '1gax', '4b3g', '2ez6', '4wrt', '5gxi', '5mfx', '4jng', '3aev', '3v71', '4wtg', '3ncu', '4oav', '3q0n', '4n0t', '5v7c', '2dxi', '3pew', '1knz', '4xww', '1cvj', '4ari', '5bud', '4ohy', '1lng', '4qil', '3gpq', '4oe1', '2voo', '4yoe', '3bx2', '5k77', '4bpb']

**Features to Describe Physicochemical Environments.** Under the FEATURE framework, microenvironment on the protein surface is described using 80 physicochemical properties. These properties include discrete features such as presence of atom type, residues and chemical groups as well as abstract features such as secondary structure, hydrophobicity, charges, solvent accessibility, etc. In our case, a fixed list of features are in use. As feature vector obtained from the FEATURE program can contain

feature that are specific to crystal structures (e.g. number of crystallographic water RESIDUE\_NAME\_IS\_HOH), to avoid capturing these unnecessary information, they are all set to 0.0 in the input vector. There are 8 such “unused” features including “RESIDUE\_NAME\_IS\_HOH” (related to presence of crystallographic water), “RESIDUE\_NAME\_IS\_OTHER” (related to unnatural or modified amino acids), “CLASS1\_IS\_UNKNOWN” (related to unnatural or modified amino acids not recognized by the FEATURE program), “CLASS2\_IS\_UNKNOWN” (related to unnatural amino acids), “MOBILITY” (related to B-factor), “ATOM-NAME-IS-OTHER” (related to presence of ion/ligand), “ATOM-TYPE-IS-Na” (related to presence of sodium), “ATOM-TYPE-IS-Ca” (related to presence of calcium). (See Supplementary Table 1) For each location of interest, the FEATURE program would divide its surrounding environment into several concentric spherical shells, each 1.25 Å thick, and evaluate the 80 physicochemical properties within each shell. In our case, 8 shells were considered; the first two shells closest to center were discarded as they are vacant by construct of surface locations (i.e. at least 2.5 Å away from protein). As a result, each data point is composed of a  $1 * 6 * 80$  tensor.

**Scoring Interface.** In the main text, we describe a unified Hidden Markov Model (HMM) approach to construct scoring interface for RNA letter sequences. The objective here is to integrate feed forward outcome from NucleicNet made on grids and to apprehend a score that consider the overall geometry of the corresponding letter sequence, which is supposed a continuous RNA strand. Two scenarios were investigated – (1) binding sites referring to a continuous RNA strand are predetermined (e.g. by ribonucleoprotein co-crystals) and (2) binding sites referring to a continuous RNA strand are estimated (e.g. by alignment with 3-mer library). In all scenarios, emission probability of the HMM can be estimated by averaging score vectors produced by feed-forward module of NucleicNet for grid points within 3 Å of the location interest. (Supplementary Figure 4) For scenario (1), emission probability refers to averaging NucleicNet results on grid points surrounding the centroid of base predetermined by co-crystals; for scenario (2), emission probability refers to averaging NucleicNet results on grid points surrounding the centroid of a k-means cluster. For hAgo2, 14 k-means centers were initiated. For scenario (1), estimation

of transition probability between consecutive bases is straightforward as these transitions are predetermined by crystal structures with respect to a continuous RNA strand; they are all set to one. For scenario (2), estimation of transition probability between consecutive bases is carried out by counting and symmetrizing transition between aligned consecutive bases; in case of hAgo2, since 5' end of the guide RNA is known to locate in the MID domain, 5' to 3' direction is also ascertained. With  $p_i$  and  $T_{i,i+1}$  affixed, score Q can then be calculated using equation presented above. Note that, at work, all calculations of score Q will start at node a and will terminate once reaching node m of the transition graph in Supplementary Figure 5; further, node n is rejected from analysis as no consecutive transition between node n and the rest of graph is found.

**Prediction pipeline.** In this subsection, we summarize our usage pipeline. (Supplementary Figure 6) First, users are required to provide atomic coordinates of a protein structure. A common prediction protocol then follows. Each location on the protein surface is marked a point such that the entire surface of the protein is seed by a layer of evenly distributed grid points. Subsequently, local physicochemical features of each location are analyzed to produce an input vector for NucleicNet, our trained deep learning module. Each location is then scored for labels indicating presence of 7 binding classes. These score vectors can be used by three different utility module depending on situation. If RNA-protein structure were predetermined, our Sequence Logo module can be applied to predict binding specificity on each nucleoside position as logo diagrams. If RNA-protein structure were not predetermined, Hidden Markov Model (HMM) needs to be constructed in order to ascertain position of nucleosides and the resultant HMM can be used as a scoring interface for letter sequences. The Visualization module applies to both situations.

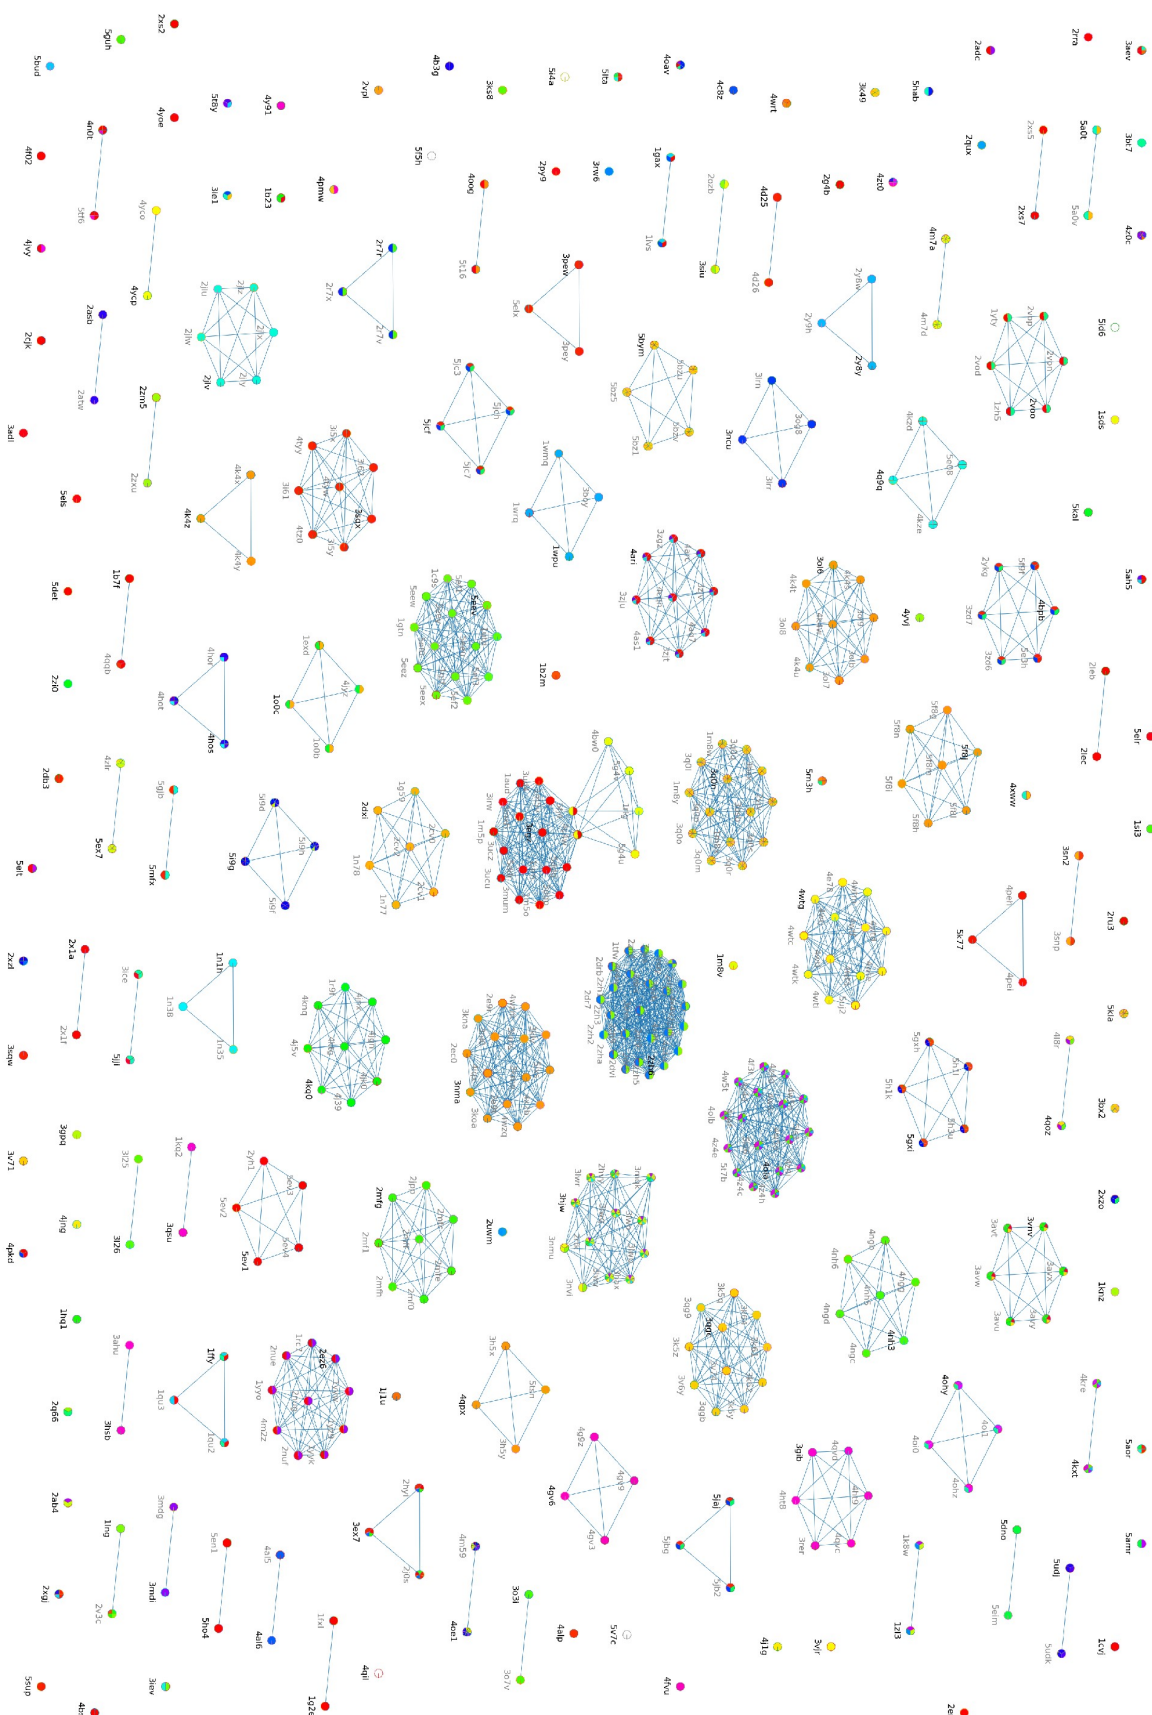

**Supplementary Figure 1 Clusters of RNA-binding Protein Sequence Homologs on the PDB.** PDB Entries sharing at least 1 chain of  $\geq 90\%$  sequence homology are linked with edges. Color on node is Pfam ID of each chain.

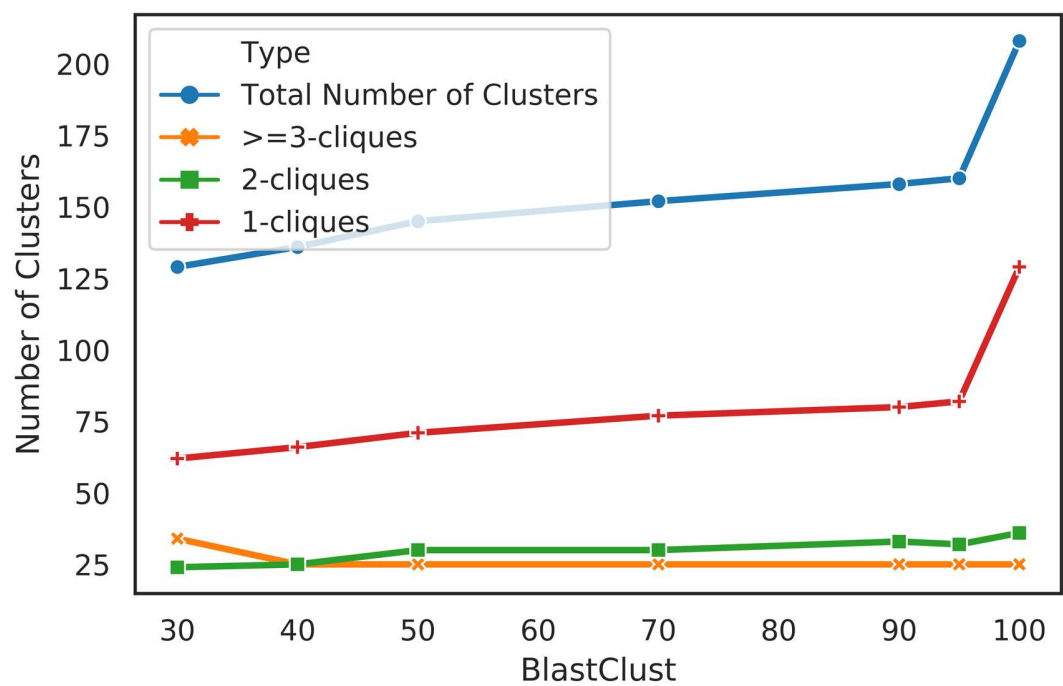

Supplementary Figure 2 Statistics of composition in the different sequence homolog clusters.



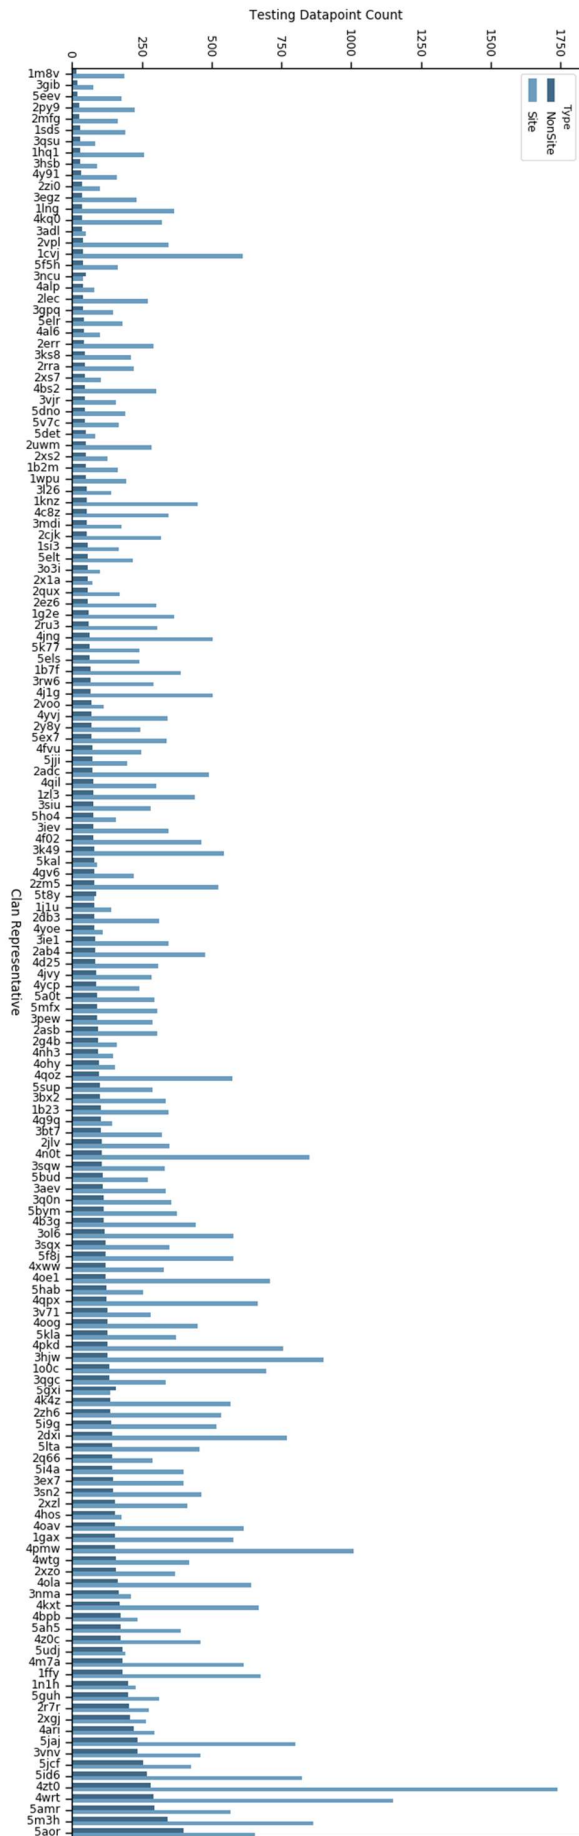

Supplementary Figure 3 Statistics of site and non-site data points in the dataset.

| Atom-based         | Residue-based         | Secondary-structure-based       |
|--------------------|-----------------------|---------------------------------|
| ATOM-TYPE-IS-C     | RESIDUE_NAME_IS_ALA   | SECONDARY_STRUCTURE1_IS_3HELIX  |
| ATOM-TYPE-IS-CT    | RESIDUE_NAME_IS_ARG   | SECONDARY_STRUCTURE1_IS_4HELIX  |
| ATOM-TYPE-IS-Ca    | RESIDUE_NAME_IS_ASN   | SECONDARY_STRUCTURE1_IS_5HELIX  |
| ATOM-TYPE-IS-N     | RESIDUE_NAME_IS_ASP   | SECONDARY_STRUCTURE1_IS_BRIDGE  |
| ATOM-TYPE-IS-N2    | RESIDUE_NAME_IS_CYS   | SECONDARY_STRUCTURE1_IS_STRAND  |
| ATOM-TYPE-IS-N3    | RESIDUE_NAME_IS_GLN   | SECONDARY_STRUCTURE1_IS_TURN    |
| ATOM-TYPE-IS-Na    | RESIDUE_NAME_IS_GLU   | SECONDARY_STRUCTURE1_IS_BEND    |
| ATOM-TYPE-IS-O     | RESIDUE_NAME_IS_GLY   | SECONDARY_STRUCTURE1_IS_COIL    |
| ATOM-TYPE-IS-O2    | RESIDUE_NAME_IS_HIS   | SECONDARY_STRUCTURE1_IS_HET     |
| ATOM-TYPE-IS-OH    | RESIDUE_NAME_IS_ILE   | SECONDARY_STRUCTURE1_IS_UNKNOWN |
| ATOM-TYPE-IS-S     | RESIDUE_NAME_IS_LEU   | SECONDARY_STRUCTURE2_IS_HELIX   |
| ATOM-TYPE-IS-SH    | RESIDUE_NAME_IS_LYS   | SECONDARY_STRUCTURE2_IS_BETA    |
| ATOM-TYPE-IS-OTHER | RESIDUE_NAME_IS_MET   | SECONDARY_STRUCTURE2_IS_COIL    |
| ATOM-NAME-IS-ANY   | RESIDUE_NAME_IS_PHE   | SECONDARY_STRUCTURE2_IS_HET     |
| ATOM-NAME-IS-C     | RESIDUE_NAME_IS_PRO   | SECONDARY_STRUCTURE2_IS_UNKNOWN |
| ATOM-NAME-IS-N     | RESIDUE_NAME_IS_SER   |                                 |
| ATOM-NAME-IS-O     | RESIDUE_NAME_IS_THR   |                                 |
| ATOM-NAME-IS-S     | RESIDUE_NAME_IS_TRP   |                                 |
| ATOM-NAME-IS-OTHER | RESIDUE_NAME_IS_TYR   |                                 |
| HYDROXYL           | RESIDUE_NAME_IS_VAL   |                                 |
| AMIDE              | RESIDUE_NAME_IS_HOH   |                                 |
| AMINE              | RESIDUE_NAME_IS_OTHER |                                 |
| CARBONYL           | CLASS1_IS_HYDROPHOBIC |                                 |
| RING-SYSTEM        | CLASS1_IS_CHARGED     |                                 |
| PEPTIDE            | CLASS1_IS_POLAR       |                                 |
|                    | CLASS1_IS_UNKNOWN     |                                 |
|                    | CLASS2_IS_NONPOLAR    |                                 |
|                    | CLASS2_IS_POLAR       |                                 |
|                    | CLASS2_IS_BASIC       |                                 |
|                    | CLASS2_IS_ACIDIC      |                                 |
|                    | CLASS2_IS_UNKNOWN     |                                 |
|                    | PARTIAL-CHARGE        |                                 |
|                    | VDW-VOLUME            |                                 |
|                    | CHARGE                |                                 |
|                    | CHARGE-WITH-HIS       |                                 |
|                    | NEG-CHARGE            |                                 |
|                    | POS-CHARGE            |                                 |
|                    | HYDROPHOBICITY        |                                 |
|                    | MOBILITY              |                                 |
|                    | SOLVENT-ACCESSIBILITY |                                 |

**Supplementary Table 1 Features to describe physicochemical environment.** Features irrelevant to proteins, which are set to zero, are written in blue.

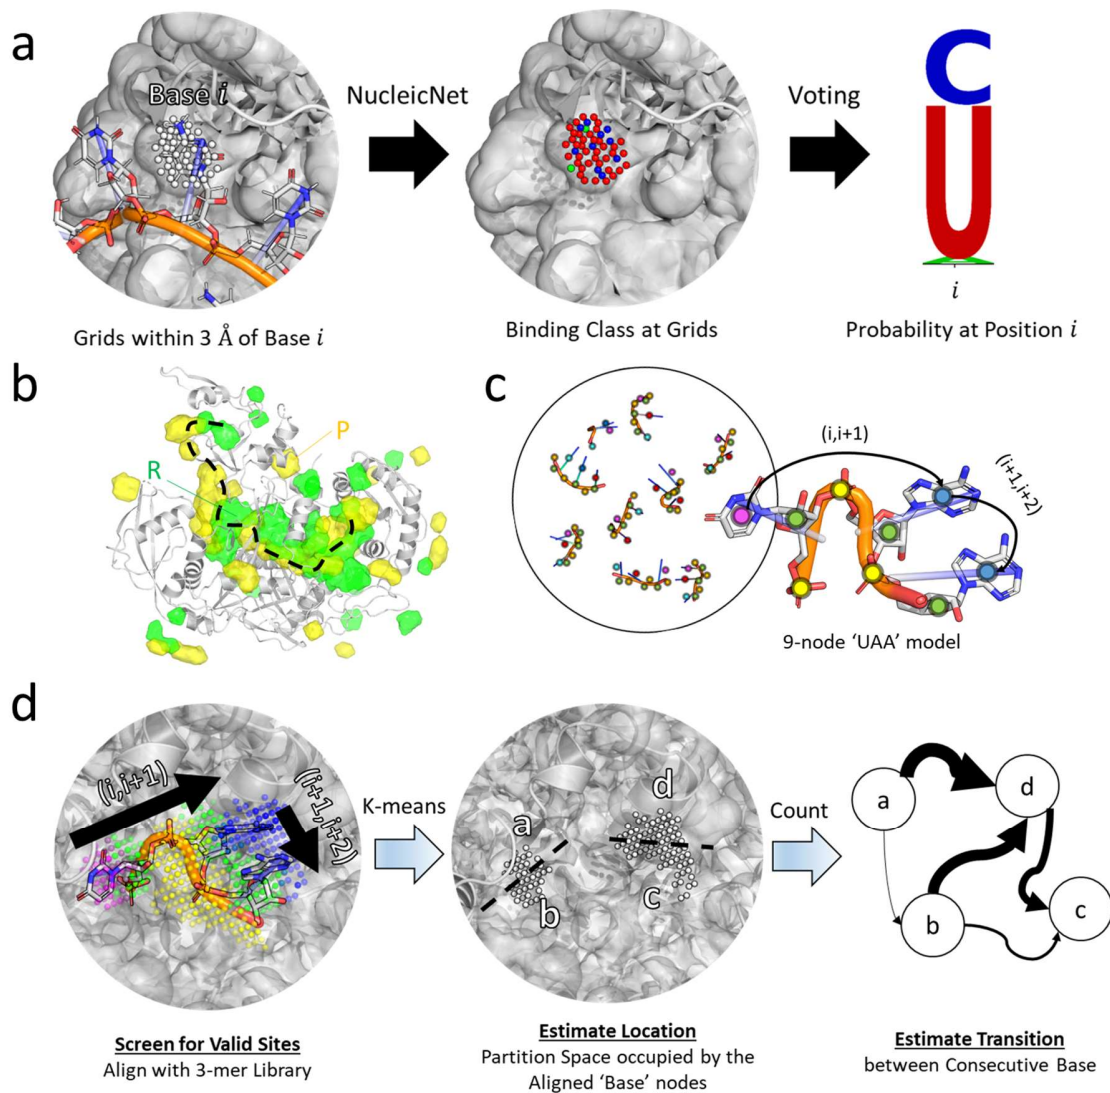

**Supplementary Figure 4 Explanatory Notes on Hidden Markov Model Scoring Interface.** (a) Voting procedure to obtain stationary probability at a location e.g. centroid of a base (b) NucleicNet prediction of backbone phosphate (P, yellow) and ribose (R, green) binding sites on a hAgo2 model (PDBID: 4f3t). The hypothesised backbone trail is indicated by dash line (c) An example of 9-node coarse grained trinucleotide model for alignment with prediction on grid points. (d) Estimation of transition probability. Left: One alignment of 9-node model with grid points after Bron-Kerbosch procedure. Count of transition between consecutive base is indicated by arrows. Middle: Partition of space occupied by aligned base nodes (white). Right: Illustration of transition probability calculated from count of transitions between partitions.

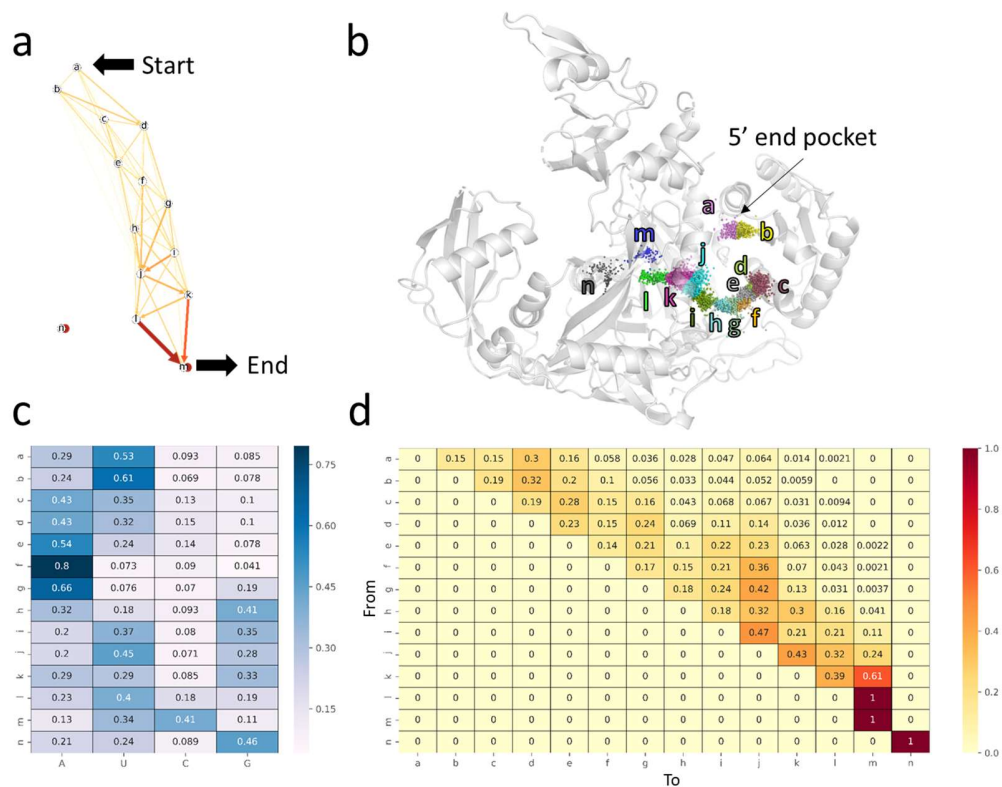

**Supplementary Figure 5 Details of the Hidden Markov Model for scoring guide RNA sequence of hAgo2.** (a) Transition graph between consecutive base. Color indicates transition probability, which is presented in (d) (b) Locations of aligned base nodes and their k-means clusters. 5' end pocket is indicated by arrow. (c) Emission probability of each node on transition graph. (d) Transition probability for each node on transition graph.

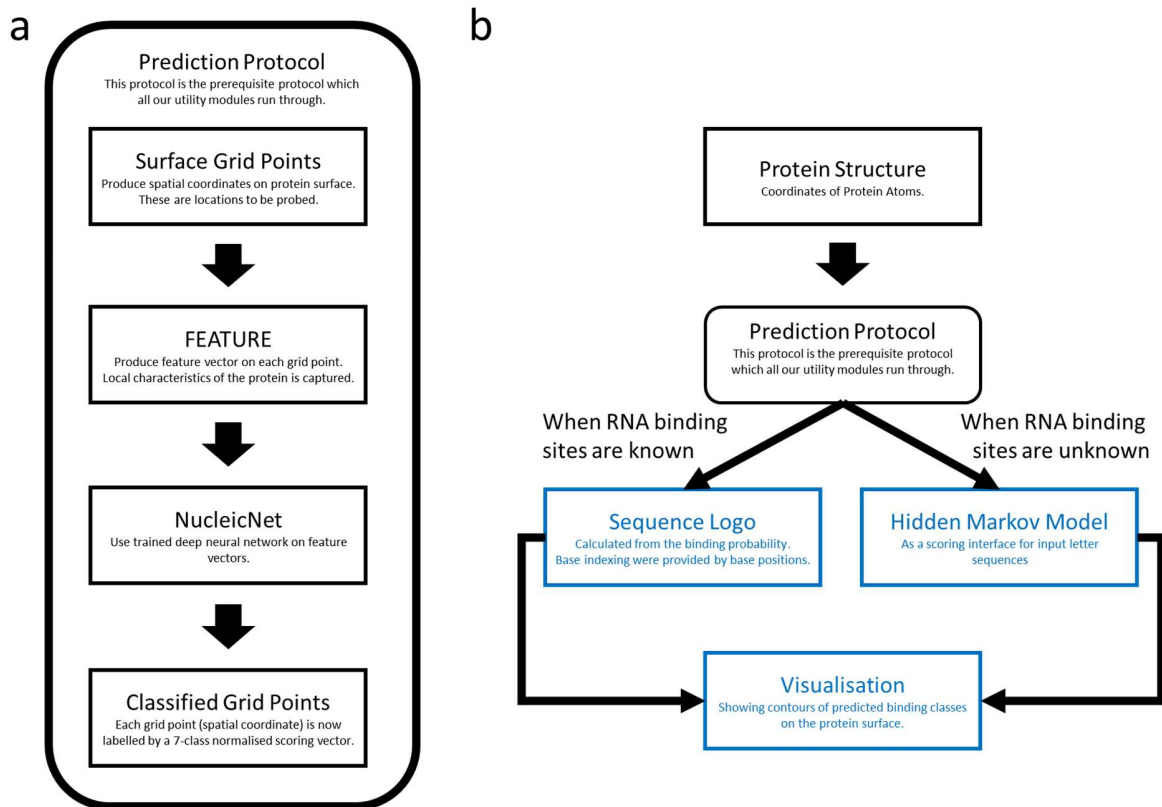

**Supplementary Figure 6 A summary of our usage pipeline.** (a) Prediction protocol common to all usages. (b) Usage of pipeline depending on situations. Three of our utilities, namely Sequence Logo prediction, Hidden Markov Model scoring interface for letter sequence and the Visualization module for predictions on general protein surfaces are highlighted in blue.

## Supplementary Note 1 Performance Metrics

Using the non-redundant dataset compiled from PDB (Methods), we benchmarked our 7-class prediction with the following metrics in a 3-fold cross validation (Main text Table 1):

$$\text{Precision} = \frac{\# \text{ True Positive}}{\# \text{ True Positive} + \# \text{ False Positive}} \quad (1)$$

$$\text{Recall} = \frac{\# \text{ True Positive}}{\# \text{ True Positive} + \# \text{ False Negative}} \quad (2)$$

$$\text{F1 Score} = \frac{\text{Precision} \times \text{Recall}}{\text{Precision} + \text{Recall}} \quad (3)$$

Macro and micro averaging of these metrics were carried out among the 3 testing folds, the results are reported in main text Table 1. For evaluations of Area Under the Receiver Operating Characteristics (AUROC), the classification results are first binarised e.g. for the class ‘Non-site’, all prediction results are binarised into either ‘Non-site’ or Non-‘Non-site’ (i.e. ‘Site’), similarly ‘Phosphate’ and Non ‘Phosphate’, etc. In the ROC curve, True Positive Rate and False Positive Rate are measured.

$$\text{True Positive Rate} = \frac{\# \text{ True Positive}}{\# \text{ True Positive} + \# \text{ False Negative}} \quad (4)$$

$$\text{False Positive Rate} = \frac{\# \text{ False Positive}}{\# \text{ False Positive} + \# \text{ True Negative}} \quad (5)$$

In main text Fig. 2c, we also show a histogram of macro-averaged accuracies with respect to data points in each of the 158 representative PDB entries tested in the 3-fold cross validation.

$$\text{Accuracy} = \frac{\# \text{ True Positive} + \# \text{ True Negative}}{\# \text{ Data point}} \quad (6)$$

The random baseline of macro-averaged accuracy cited therein, can be calculated by accounting the prior ratio  $p$  in data point with respect to each of the 7 class labels, X/P/R/A/U/C/G

*Random Baseline Accuracy*

$$\begin{aligned} &= \frac{1}{\text{Total \# datapoint}} (\text{Expected \# True Positive}) \\ &= \frac{1}{\text{Total \# datapoint}} (\#X * p(X) + \#P * p(P) + \#R * p(R) + \#A * p(A) + \#G * p(G) + \#C * p(C) + \#U * p(U)) \\ &= 0.33 * 0.33 + 0.26 * 0.26 + 0.21 * 0.21 + 0.049 * 0.049 + 0.045 * 0.045 + 0.048 * 0.048 + 0.054 * 0.054 \\ &= 0.23 \end{aligned}$$

## Supplementary Note 2 In-vitro RNAcompete assays

In main text Fig. 4, we describe comparison of NucleicNet score with RNAcompete PWM score. The RNAcompete PWM is derived from position frequency matrices (PFM) on [http://hugheslab.ccb.utoronto.ca/supplementary-data/RNAcompete\\_eukarya/top10align\\_motifs.tar.gz](http://hugheslab.ccb.utoronto.ca/supplementary-data/RNAcompete_eukarya/top10align_motifs.tar.gz), which were obtained by aligning the top 10 binding sequences for each RBP from RNAcompete experiment. In Supplementary Figure 7, we plot NucleicNet score against RNAcompete PWM score. Each data point correspond to one 7-mer sequence. A jitter of 0.1 is added to both scores to avoid overlap of datapoint. On the graph, we further indicate the top 10 sequence provided by RNAcompete z-score, which is deposited on [http://hugheslab.ccb.utoronto.ca/supplementary-data/RNAcompete\\_eukarya/z\\_scores.txt.gz](http://hugheslab.ccb.utoronto.ca/supplementary-data/RNAcompete_eukarya/z_scores.txt.gz). In Supplementary Table 2 and Supplementary Figure 8, we show that RNAcompete is capable of differentiating top and bottom sequences suggested by the z-score. Several rank ranges were tested including 10, 50, 100 top/bottom sequences. In all cases, NucleicNet is no worse than RNAC in terms of its differential power; in some cases, NucleicNet performs slightly better than the latter, presumably because the provided RNAC PWM only addresses the top 10 sequence. Also note that some z-scores provided by the RNAC are the same for some top sequences (i.e. their rank are indistinguishable within detection limit) such that their rank are randomized when we look for top/bottom sequences and this affects quality of the t-test; we are not sure which sequence RNAC authors picked to compile their position frequency matrix (PFM) in that situation; this also explains why NucleicNet results appear slightly better in some situation (e.g. TARDBP, RBFOX1). Otherwise, both NucleicNet Score and RNAC PWM score are capable of distinguishing the top/bottom sequences in all cases.

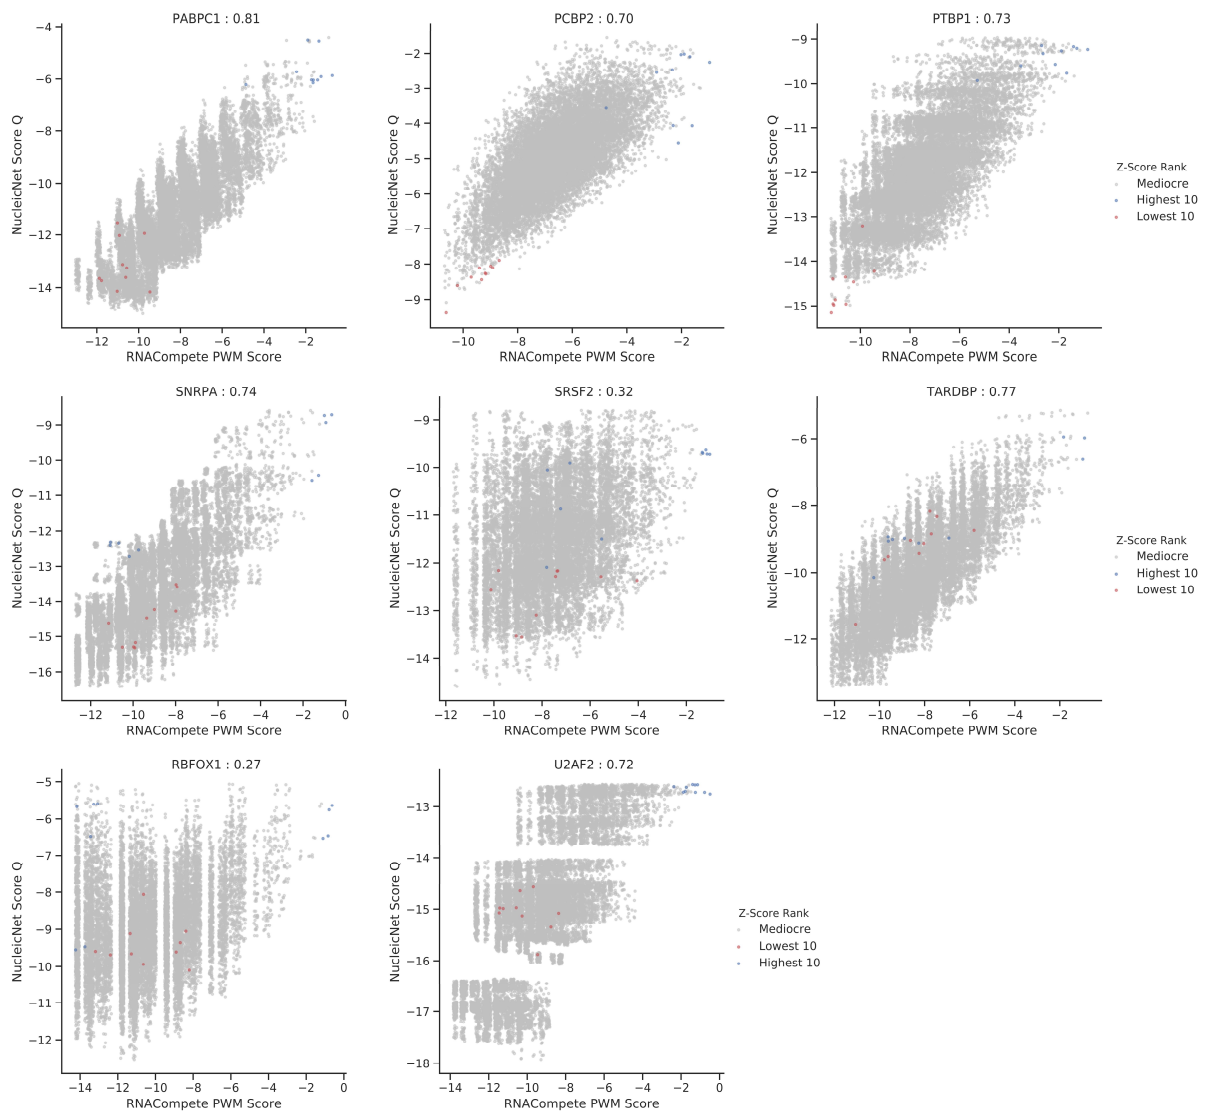

**Supplementary Figure 7 Comparing PWMs of NucleicNet and RNACompete assay.** Plot of NucleicNet Score Q against RNACompete PWM score. Each data point correspond to one 7-mer sequence. A jitter of 0.1 is added to both scores to avoid overlap of datapoint. Note that the provided PWMs from RNACompete are aligned from the top 10 binding sequence. Pearson correlation is noted on the title of each graph. Top and Bottom 10 sequence are marked in blue and red respectively. Rank of the sequence is provided by RNAC Z-score.



| Fig. 4 | Gene Name | Sampled PDBID | RNAC ID | NucleicNet Welch's t-Test Statistics (Highest - Lowest) |       | NucleicNet Welch's t-Test P-value |          | RNAC Welch's t-Test Statistics (Highest - Lowest) |       | RNAC Welch's t-Test P-value |          |
|--------|-----------|---------------|---------|---------------------------------------------------------|-------|-----------------------------------|----------|---------------------------------------------------|-------|-----------------------------|----------|
|        |           |               |         | Rank                                                    | Value | Rank                              | Value    | Rank                                              | Value | Rank                        | Value    |
| a      | PABPC1    | 1cvj          | 00155   | 10                                                      | 20.7  | 10                                | 6.1E-13  | 10                                                | 21.2  | 10                          | 5.7E-13  |
|        |           |               |         | 50                                                      | 37.3  | 50                                | 3.8E-58  | 50                                                | 32.3  | 50                          | 6.6E-54  |
|        |           |               |         | 100                                                     | 45.3  | 100                               | 2.3E-106 | 100                                               | 44.3  | 100                         | 1.9E-104 |
| b      | PCBP2     | 2py9          | 00044   | 10                                                      | 16.0  | 10                                | 1.9E-09  | 10                                                | 19.8  | 10                          | 6.7E-12  |
|        |           |               |         | 50                                                      | 35.1  | 50                                | 6.8E-55  | 50                                                | 33.6  | 50                          | 2.8E-50  |
|        |           |               |         | 100                                                     | 48.2  | 100                               | 1.8E-106 | 100                                               | 37.4  | 100                         | 1.1E-81  |
| c      | PTBP1     | 2adc          | 00269   | 10                                                      | 25.3  | 10                                | 6.7E-13  | 10                                                | 18.3  | 10                          | 1.9E-10  |
|        |           |               |         | 50                                                      | 32.5  | 50                                | 5.7E-53  | 50                                                | 31.9  | 50                          | 6.1E-43  |
|        |           |               |         | 100                                                     | 42.2  | 100                               | 7.8E-100 | 100                                               | 42.0  | 100                         | 1.1E-87  |
| d      | RBFOX1    | 2err          | 00168   | 10                                                      | 5.2   | 10                                | 2.4E-04  | 10                                                | 0.9   | 10                          | 4.0E-01  |
|        |           |               |         | 50                                                      | 5.0   | 50                                | 3.2E-06  | 50                                                | 0.3   | 50                          | 7.0E-01  |
|        |           |               |         | 100                                                     | 5.8   | 100                               | 2.6E-08  | 100                                               | -0.23 | 100                         | 8.1E-01  |
| e      | SNRPA     | 1aud          | 00071   | 10                                                      | 6.2   | 10                                | 4.9E-05  | 10                                                | 2.2   | 10                          | 5.3E-02  |
|        |           |               |         | 50                                                      | 6.8   | 50                                | 1.0E-09  | 50                                                | 2.1   | 50                          | 3.2E-02  |
|        |           |               |         | 100                                                     | 8.1   | 100                               | 9.1E-14  | 100                                               | 2.5   | 100                         | 1.2E-02  |
| f      | SRSF2     | 2lec          | 00072   | 10                                                      | 7.0   | 10                                | 3.9E-06  | 10                                                | 3.2   | 10                          | 6.2E-03  |
|        |           |               |         | 50                                                      | 16.4  | 50                                | 2.1E-29  | 50                                                | 7.9   | 50                          | 2.0E-11  |
|        |           |               |         | 100                                                     | 19.8  | 100                               | 1.2E-48  | 100                                               | 11.8  | 100                         | 1.9E-23  |
| g      | TARDBP    | 4bs2          | 00076   | 10                                                      | 1.7   | 10                                | 1.1E-01  | 10                                                | 1.3   | 10                          | 2.0E-01  |
|        |           |               |         | 50                                                      | 3.9   | 50                                | 2.1E-04  | 50                                                | 3.6   | 50                          | 6.5E-04  |
|        |           |               |         | 100                                                     | 5.4   | 100                               | 2.2E-07  | 100                                               | 6.0   | 100                         | 1.4E-08  |
| h      | U2AF2     | 2g4b          | 00079   | 10                                                      | 20.2  | 10                                | 8.3E-09  | 10                                                | 22.1  | 10                          | 8.2E-12  |
|        |           |               |         | 50                                                      | 26.6  | 50                                | 7.6E-33  | 50                                                | 37.1  | 50                          | 2.5E-59  |
|        |           |               |         | 100                                                     | 29.7  | 100                               | 1.2E-60  | 100                                               | 39.2  | 100                         | 5.7E-91  |

**Supplementary Table 2 Welch's T-test for NucleicNet Score and RNAC PWM score in separating top and bottom sequence.** Note that PWMs provided by RNAC are obtained by aligning top 10 binding sequence. In all cases, NucleicNet is no worse than RNAC in terms of its differential power; in some cases, NucleicNet performs slightly better than the latter, presumably because the provided RNAC PWM only addresses the top 10 sequence. Also note that some z-scores provided by the RNAC are the same for some top sequences (i.e. their rank are indistinguishable within detection limit) such that their rank are randomized when we do comparison and this affects quality of the t-test; we are not sure which sequence RNAC authors picked to compile their position frequency matrix (PFM) in that situation; this also explains why NucleicNet results appear slightly better in some situation (e.g. TARDBP, RBFOX1). Otherwise, both NucleicNet Score and RNAC PWM score are capable of distinguishing the top/bottom sequences in all cases.

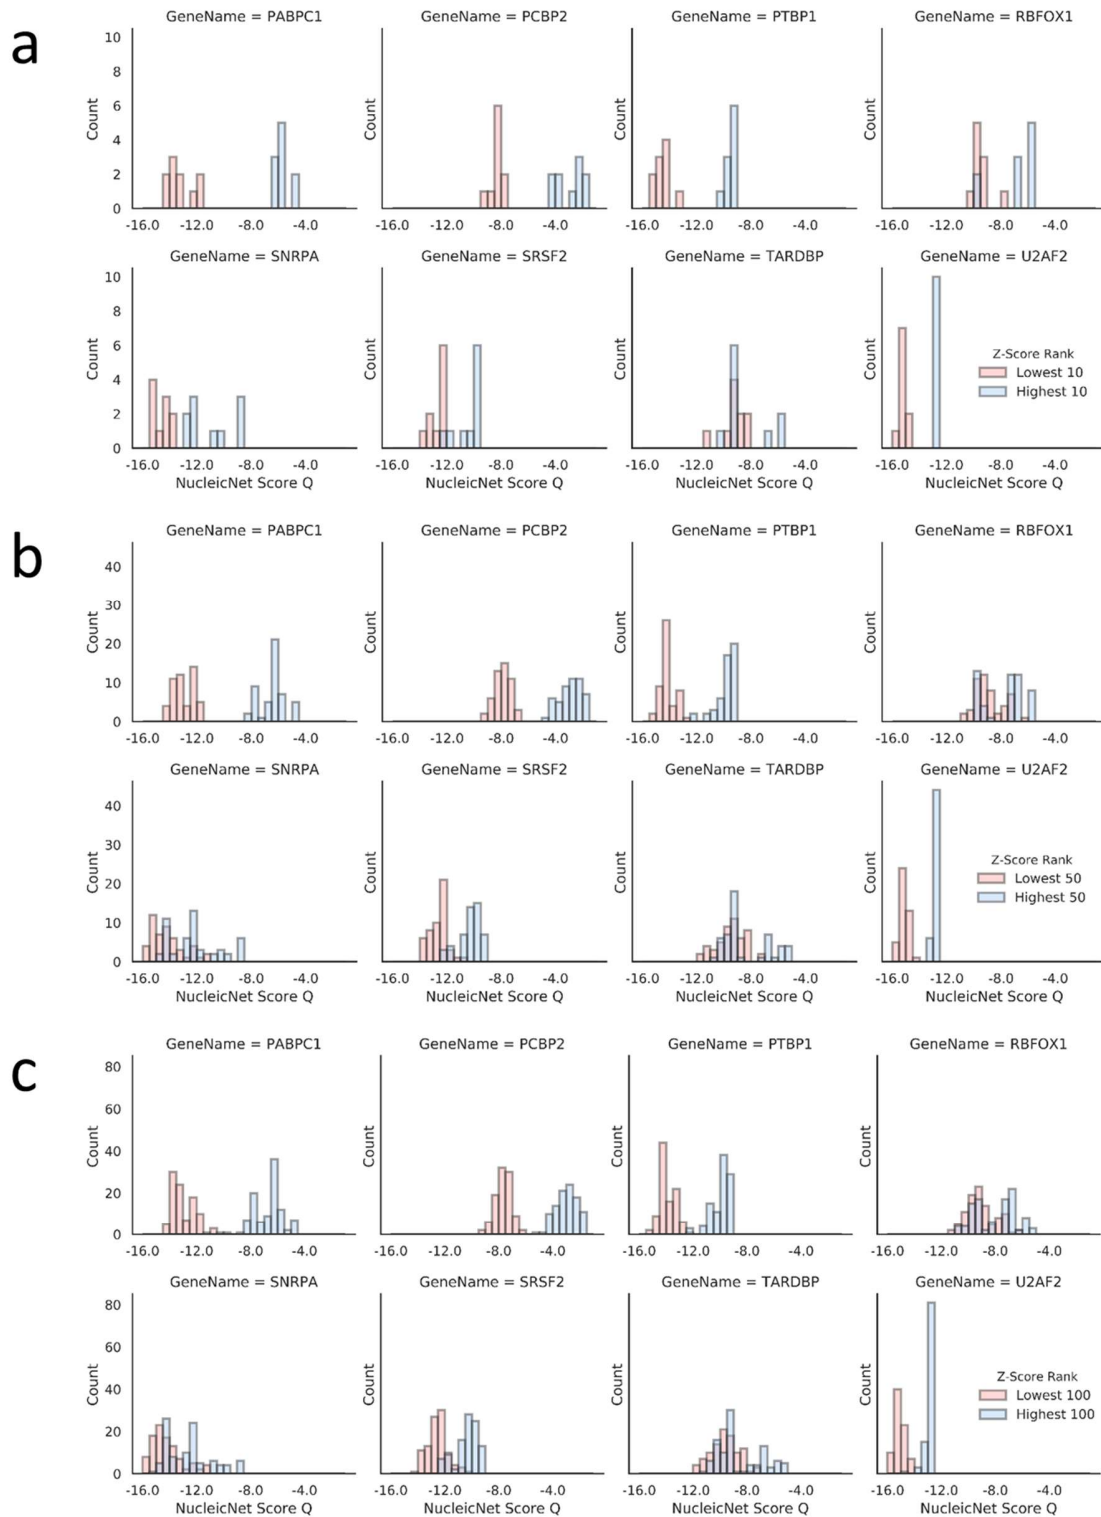

**Supplementary Figure 8 Distribution of NucleicNet score and RNAC PWM score for other ranks of top and bottom sequence.** (a) NucleicNet Score at rank 10 (b) NucleicNet Score at rank 50 (c) NucleicNet Score at rank 100 (d) RNAC PWM score at rank 10 (e) RNAC PWM score at rank 50 (f) RNAC PWM score at rank 100. Note that PWMs provided by RNAC are obtained by aligning only top 10 binding sequence.

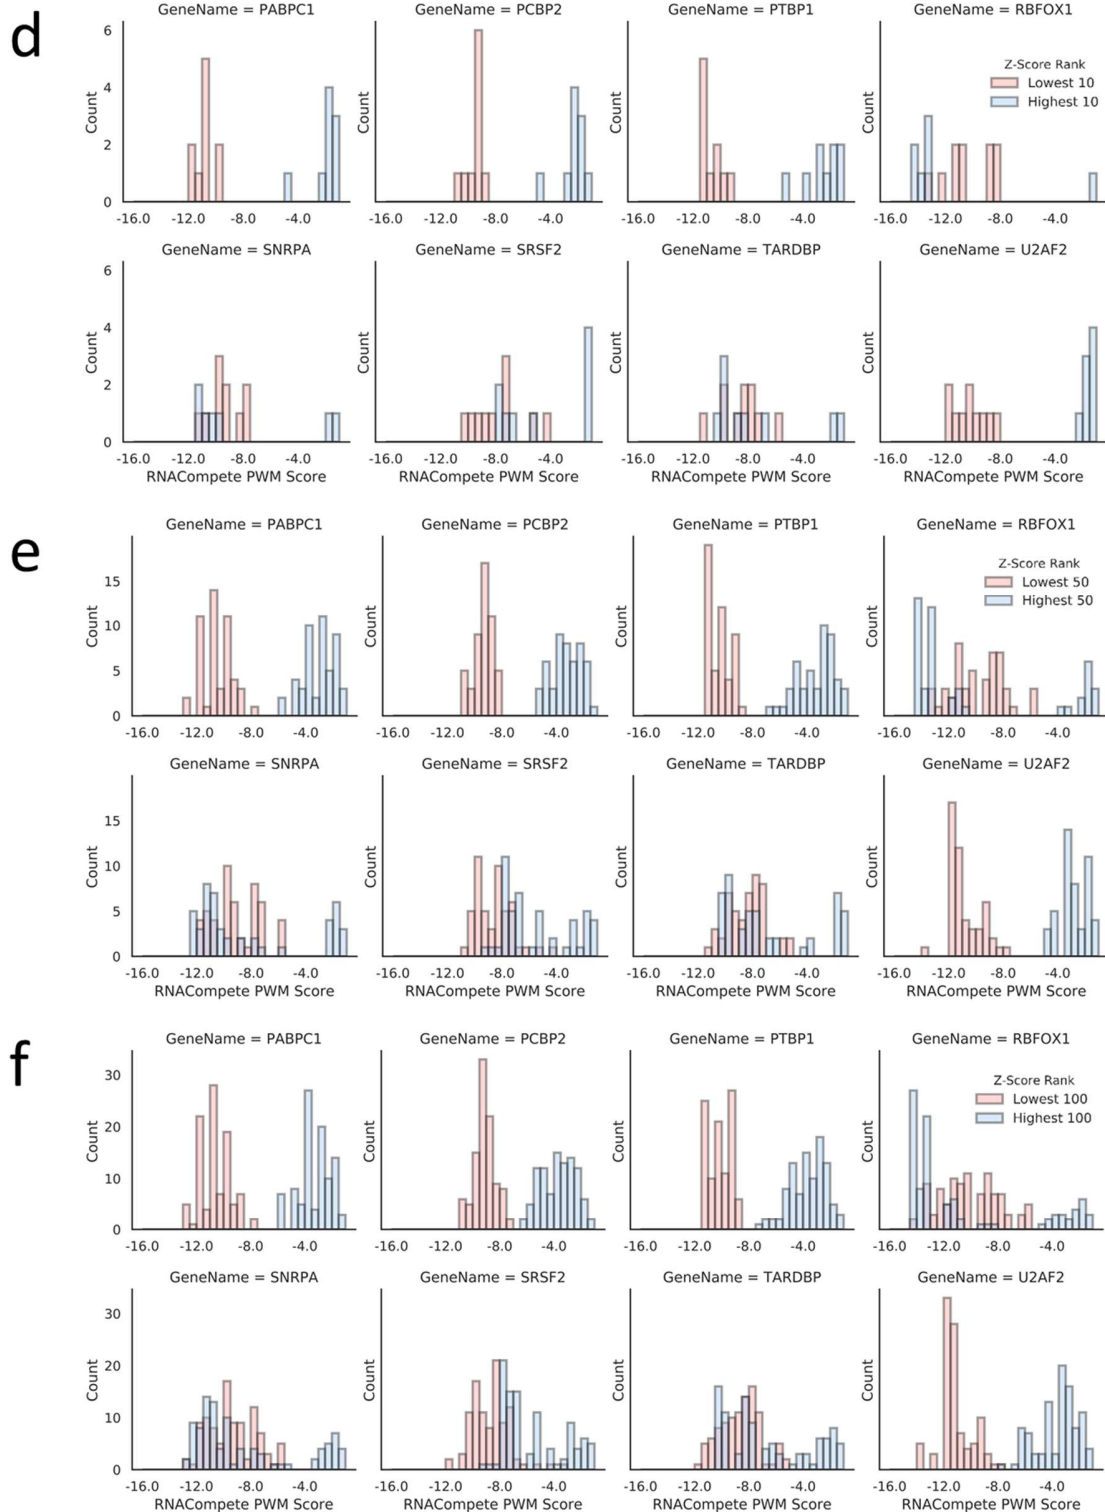

**Supplementary Figure 8 Distribution of NucleicNet score and RNAC PWM score for other ranks of top and bottom sequence. (Con't)** (a) NucleicNet Score at rank 10 (b) NucleicNet Score at rank 50 (c) NucleicNet Score at rank 100 (d) RNAC PWM score at rank 10 (e) RNAC PWM score at rank 50 (f) RNAC PWM score at rank 100. Note that PWMs provided by RNAC are obtained by aligning only top 10 binding sequence.

### Supplementary Note 3 In-vivo Ago-RIP-Seq Data

In the main text Fig. 5a, we described statistics test to investigate asymmetry loading behavior of guide and passenger strand in RISC assembly and we show that 76 % of the pairs show positive difference in NucleicNet Score ( $Q_{guide} - Q_{passenger}$ ). In Supplementary Table 3, we show the p-value for Wilcoxon Sign Test and Paired T-test. In Table 4, we listed all tested duplexes, their experimental data source and predicted NucleicNet score; these data are collected from 5 different cell lines, namely four from human - Acute monocytic leukemia THP-1 (Burroughs, A. M. et al. Deep-sequencing of human Argonaute-associated small RNAs provides insight into miRNA sorting and reveals Argonaute association with RNA fragments of diverse origin. *RNA Biology* 8, 158–177 (2011)), colon cancer DLD (Kanematsu, S., Tanimoto, K., Suzuki, Y. & Sugano, S. Screening for possible miRNA–mRNA associations in a colon cancer cell line. *Gene* 533, 520–531 (2014)), colon cancer HCT116 (Krell, J. et al. TP53 regulates miRNA association with AGO2 to remodel the miRNA-mRNA interaction network. *Genome Res.* gr.191759.115 (2015). doi:10.1101/gr.191759.115) and T cell leukemia (Carissimi, C. et al. Comprehensive RNA dataset of AGO2 associated RNAs in Jurkat cells following miR-21 over-expression. *Data in Brief* 7, 604–606 (2016))<sup>4</sup> - and one from mouse - neuroblastoma N2a (Li, N. et al. Global profiling of miRNAs and the hairpin precursors: insights into miRNA processing and novel miRNA discovery. *Nucleic Acids Res* 41, 3619–3634 (2013)).

**Supplementary Table 3 P-values for different datasets for Wilcoxon Sign Test and Paired T-test in distinguishing guide and passenger strand.**

| Dataset     | Wilcoxon Sign Test p-value | Paired T-test p-value |
|-------------|----------------------------|-----------------------|
| Overall     | 8.4 e-13                   | 2.15 e-13             |
| BurroughsAM | 0.00063                    | 0.00069               |
| ClaudiaC    | 0.0011                     | 0.0016                |
| KanematsuS  | 0.0012                     | 0.00065               |
| KrellJ      | 0.0023                     | 0.0014                |
| LiN         | 0.0013                     | 0.0018                |

**Supplementary Table 4 All tested duplexes, their sequence and NucleicNet scores.**

| Guide Name       | Guide Sequence          | Guide RPM | Passenger Name   | Passenger Sequence      | Passenger RPM | Passenger NucleicNet Score Q | Guide NucleicNet Score Q | Data Source | Performance |
|------------------|-------------------------|-----------|------------------|-------------------------|---------------|------------------------------|--------------------------|-------------|-------------|
| mmu-miR-101a-3p  | UACAGUACUGUGAUACUGAA    | 11225     | mmu-miR-101a-5p  | UCAGUUAUCACAGUGCUGAUGC  | 0.6           | -10.1                        | -10.4                    | LiN         | Negative    |
| mmu-miR-1224-5p  | GUGAGGACUGGGAGUGGAG     | 189       | mmu-miR-1224-3p  | CCCCACCUCUCUCUCCUCAG    | 0.0           | -13.4                        | -12.7                    | LiN         | Positive    |
| mmu-miR-466f-3p  | CAUACACACACACAUACACAC   | 125       | mmu-miR-466f-5p  | UACGUGUGUGUGCAUGUGCAUG  | 0.0           | -11.4                        | -12.2                    | LiN         | Negative    |
| mmu-miR-143-3p   | UGAGAUGAAGCACUGUAGCUC   | 46505     | mmu-miR-143-5p   | GGUGCAGUGUCGCAUCUCUGC   | 2.3           | -13.8                        | -11.9                    | LiN         | Positive    |
| mmu-miR-127-3p   | UCGGAUCCGUCGAGCUUGGCU   | 651       | mmu-miR-127-5p   | CUGAAGUCAGAGGGCUCUGAU   | 6.5           | -12.0                        | -10.3                    | LiN         | Positive    |
| mmu-miR-130a-3p  | CAGUGCAAGUUA AAAAGGGCAU | 1228      | mmu-miR-130a-5p  | GCUCUUUUCACAUUGGUCUACU  | 0.7           | -12.0                        | -12.6                    | LiN         | Negative    |
| mmu-miR-186-5p   | CAAAGAAUUUCUUUGGGCU     | 2448      | mmu-miR-186-3p   | GCCCUAAGGUAUUUUUGGG     | 6.6           | -15.8                        | -11.4                    | LiN         | Positive    |
| mmu-miR-375-3p   | UUUGUUGUCGCGCUCGCGUGA   | 65        | mmu-miR-375-5p   | GCGACGAGCCCCUCGCAAAAC   | 0.0           | -15.2                        | -9.8                     | LiN         | Positive    |
| mmu-miR-134-5p   | UGUGACUGGUAGCCAGAGGGG   | 120       | mmu-miR-134-3p   | CUGUGGGCCACCUAGUCACC    | 0.1           | -12.9                        | -11.5                    | LiN         | Positive    |
| mmu-let-7g-5p    | UGAGGUAGUAGUUUGUACAGUU  | 1502      | mmu-let-7g-3p    | ACUGUACAGGCCACUGCCUUGC  | 0.4           | -12.1                        | -11.8                    | LiN         | Positive    |
| mmu-miR-99a-5p   | AACCCGUAAGUCCGACUUGUG   | 120       | mmu-miR-99a-3p   | CAAGUCGUUUUCUUGGGUCU    | 0.2           | -11.2                        | -12.5                    | LiN         | Negative    |
| mmu-miR-466n-3p  | UAUACAUAGAGCAUCAUAGA    | 95        | mmu-miR-466n-5p  | GUGUGUGCGUACAUUGUACUUGU | 0.0           | -12.2                        | -10.7                    | LiN         | Positive    |
| mmu-miR-192-5p   | CUGACCUAUGAAUUGACAGCC   | 936       | mmu-miR-192-3p   | CGCCAAUUCUUAAGGUCACAG   | 0.0           | -13.0                        | -12.0                    | LiN         | Positive    |
| mmu-miR-29a-3p   | UAGCACCAUCUGAAAUCGGUUA  | 4185      | mmu-miR-29a-5p   | ACUGAUUUUUUGGGUUCAG     | 11.4          | -11.1                        | -10.5                    | LiN         | Positive    |
| mmu-miR-98-5p    | UGAGGUAGUAGUUUGUUAUUGU  | 69        | mmu-miR-98-3p    | CUAUACAACUUAUCUUUCCU    | 0.5           | -12.1                        | -11.8                    | LiN         | Positive    |
| mmu-miR-467e-5p  | AUAAGUAGUAGCAUUGUUAUGU  | 71        | mmu-miR-467e-3p  | AUAUAACAACACACCUUAUAU   | 0.0           | -10.1                        | -9.7                     | LiN         | Positive    |
| mmu-miR-32-5p    | UAUUGCAUUAUUAAGUUGCA    | 157       | mmu-miR-32-3p    | CAAUUUAGUGUGUGUUAUUAU   | 0.1           | -11.5                        | -9.6                     | LiN         | Positive    |
| mmu-miR-467d-5p  | UAAGUGCGCGCAUUAUUGCG    | 805       | mmu-miR-467d-3p  | AUAUAACAACACACCUUACAC   | 0.0           | -10.1                        | -9.7                     | LiN         | Positive    |
| mmu-miR-33-5p    | GUGAUUUGUAGUUGCAUUGCA   | 317       | mmu-miR-33-3p    | CAAUUUUCCACAGUGCAUCAC   | 1.8           | -10.0                        | -13.1                    | LiN         | Negative    |
| mmu-miR-488-3p   | UUGAAAGCGUGUUUCUUGGUC   | 562       | mmu-miR-488-5p   | CCCAGAUUAUAGCACUUCUCAA  | 4.7           | -14.2                        | -12.0                    | LiN         | Positive    |
| mmu-miR-25-3p    | CAUUGCAUUGUCGCGUUCUGA   | 1572      | mmu-miR-25-5p    | AGCGGAGACUUGGGCAUUGC    | 2.1           | -14.6                        | -11.4                    | LiN         | Positive    |
| mmu-miR-374b-5p  | AUAUAACAACCCUGCUAGUG    | 463       | mmu-miR-374b-3p  | GGUUGUAUUAUUAUUGCCGAG   | 0.1           | -12.9                        | -10.7                    | LiN         | Positive    |
| mmu-miR-465c-5p  | UAUUUAAGAUUGGGCUGAUCUG  | 10724     | mmu-miR-465c-3p  | GAUCAGGGCCUUUCUUAUAGAG  | 0.0           | -14.3                        | -11.1                    | LiN         | Positive    |
| mmu-let-7b-5p    | UGAGGUAGUAGGUUGUGUGGUU  | 1940      | mmu-let-7b-3p    | CUAUACAACCUACUGCCUCC    | 1.6           | -12.1                        | -11.8                    | LiN         | Positive    |
| mmu-miR-146b-5p  | UGAAGACUGAAUUCUUAAGCG   | 9450      | mmu-miR-146b-3p  | GCUCUAGGGACUAGUUUCUGU   | 0.6           | -15.9                        | -10.5                    | LiN         | Positive    |
| mmu-miR-15a-5p   | UAGCAGCAUAUAUUGGUUUGU   | 296       | mmu-miR-15a-3p   | AGGCCAUUACUGUGCCUCCU    | 0.6           | -11.5                        | -11.7                    | LiN         | Negative    |
| mmu-miR-467c-5p  | UAGUGCGGUGCAUUAUUGUG    | 245       | mmu-miR-467c-3p  | AUAUAACAACACACCUUAUAC   | 0.0           | -10.1                        | -9.7                     | LiN         | Positive    |
| mmu-miR-27b-5p   | AGAGCUUAGUAGUUGUGAAC    | 153       | mmu-miR-27b-3p   | UUCACAGUGGGCUAUGUCGC    | 0.0           | -11.7                        | -11.4                    | LiN         | Positive    |
| mmu-miR-744-5p   | UGCGGGGCUAGGGCUAACAGCA  | 2535      | mmu-miR-744-3p   | CUGUUGCCACUAACCUAACCU   | 2.8           | -11.1                        | -12.9                    | LiN         | Negative    |
| mmu-miR-26b-5p   | UUAACAAGUUAUUGAUGUAGU   | 989       | mmu-miR-26b-3p   | CCUUGUCUUAUUAUUGGCU     | 0.5           | -11.5                        | -11.0                    | LiN         | Positive    |
| mmu-miR-467b-3p  | AUAUAACAACACACCAACAC    | 127       | mmu-miR-467b-5p  | GUAAGGCGUAGUUAUUAUG     | 0.0           | -10.8                        | -10.1                    | LiN         | Positive    |
| mmu-let-7i-5p    | UGAGGUAGUAGUUUGUGUGUU   | 120       | mmu-let-7i-3p    | CUGCGCAAGCUACUUGCCUUGU  | 0.1           | -13.8                        | -11.8                    | LiN         | Positive    |
| mmu-miR-3099-3p  | UAGGCUAGAGAGGUGGGGCUA   | 28        | mmu-miR-3099-5p  | CCAGCUUCCUCCAGCCUUG     | 0.0           | -11.3                        | -11.0                    | LiN         | Positive    |
| mmu-miR-1191b-5p | UCAGGCUACAGAGCGAGAACCU  | 38        | mmu-miR-1191b-3p | AGACUACUAUGUAGCCCAAGC   | 0.3           | -11.1                        | -10.7                    | LiN         | Positive    |
| mmu-miR-880-3p   | UACUCAUCCUCUCUGAGUAGA   | 12825     | mmu-miR-880-5p   | UACUCAGAUUGAUUGAGUCA    | 0.4           | -12.3                        | -10.2                    | LiN         | Positive    |
| mmu-miR-30d-5p   | UGUAAACAUCGCCGACUGGAAG  | 35106     | mmu-miR-30d-3p   | CUUUCAGUCAGAUUUUGUCUG   | 10.1          | -12.4                        | -11.8                    | LiN         | Positive    |
| mmu-miR-184-3p   | UGGACGGGGAACUGAUAAGGGG  | 4192      | mmu-miR-184-5p   | CCUUAUCACUUUCAGCCAGC    | 0.3           | -12.7                        | -13.2                    | LiN         | Negative    |
| mmu-miR-146a-5p  | UGAGAUCUGAAUUCUUGGGUU   | 1390      | mmu-miR-146a-3p  | CCUGUGAAUUCAGUUCUUCAG   | 0.1           | -14.4                        | -10.5                    | LiN         | Positive    |
| mmu-miR-99b-5p   | CACCCGUAAGAACCCACCUUGCG | 61915     | mmu-miR-99b-3p   | CAAGCUCGUGUCUGUGGGUCCG  | 124.5         | -11.2                        | -13.6                    | LiN         | Negative    |
| mmu-miR-669d-5p  | ACUUGUGUGUGCAUUGUUAUGU  | 26        | mmu-miR-669d-3p  | UAUAUAACAACCAUAUAUC     | 0.0           | -10.6                        | -11.9                    | LiN         | Negative    |
| mmu-miR-203-3p   | GUGAAAUUGUUAAGGACCAUAG  | 635       | mmu-miR-203-5p   | AGUGGUUCUUGACAGUUAACA   | 1.0           | -10.9                        | -13.1                    | LiN         | Negative    |
| mmu-miR-328-3p   | CUGGCCUCUCUGCCUUCUGU    | 200       | mmu-miR-328-5p   | GGGGGCGAGGAGGGCUCAGGG   | 0.1           | -14.3                        | -10.8                    | LiN         | Positive    |
| mmu-miR-100-5p   | AACCCGUAAGUCCGAACUUGUG  | 464       | mmu-miR-100-3p   | ACAAGCUUGUGUUAUAGGUUAU  | 0.1           | -10.4                        | -12.5                    | LiN         | Negative    |
| mmu-miR-27a-3p   | UUCACAGUGGCUAAGUCCCG    | 48429     | mmu-miR-27a-5p   | AGGGCUUAGCUGUUGUGAGCA   | 10.4          | -11.7                        | -11.7                    | LiN         | Positive    |
| mmu-miR-23a-3p   | AUCACAUUCCAGGGGAUUUCC   | 2386      | mmu-miR-23a-5p   | GGGGUUCUGGGGAUGGGAUUU   | 0.1           | -11.5                        | -11.4                    | LiN         | Positive    |
| mmu-miR-881-3p   | AACUGUGUCUUUCUGAAUAGA   | 6394      | mmu-miR-881-5p   | CAGAGGAUAACAAGUACAUAUC  | 0.5           | -13.7                        | -11.5                    | LiN         | Positive    |
| mmu-miR-320-3p   | AAAAGCUGGGUUGAGAGGGGCU  | 841       | mmu-miR-320-5p   | GCUUUCUUCUCCGGUUCUUC    | 0.0           | -12.0                        | -10.3                    | LiN         | Positive    |
| mmu-miR-379-5p   | UGUAGACUUAUGAACGUAGG    | 1723      | mmu-miR-379-3p   | UAUUAACAUGGUCACUAUAUC   | 2.7           | -10.1                        | -12.0                    | LiN         | Negative    |
| mmu-miR-300-3p   | UAUGCAAGGGCAAGCUUCUUC   | 68        | mmu-miR-300-5p   | UUGAAGAGGGUUAUUCUUGU    | 0.2           | -12.0                        | -11.7                    | LiN         | Positive    |
| mmu-miR-378a-3p  | ACUGGACUUGGAGUCAGAAGG   | 90540     | mmu-miR-378a-5p  | CUCUGACUCCAGGUCCUGUGU   | 14.2          | -13.2                        | -11.8                    | LiN         | Positive    |
| mmu-miR-21a-5p   | UAGCUUAUCAGACUGAUGUGA   | 62943     | mmu-miR-21a-3p   | CAACAGCAGUCGAGGGCUGUC   | 29.8          | -12.8                        | -10.1                    | LiN         | Positive    |
| mmu-let-7e-5p    | UGAGGUAGGAGGUUAUAGUU    | 2013      | mmu-let-7e-3p    | CUAUACGGCCUUGGUUCC      | 2.8           | -12.5                        | -11.8                    | LiN         | Positive    |
| hsa-miR-21-5p    | UAGCUUAUCAGACUGAUGUGA   | 40140     | hsa-miR-21-3p    | CAACACCGAGUAGGGCUGU     | 53.0          | -11.9                        | -10.1                    | KanematsuS  | Positive    |
| hsa-miR-30b-5p   | UUAACAACUCCACACUAGCUC   | 963       | hsa-miR-30b-3p   | UUGGAGGUGGUAUUAUUAUC    | 1.2           | -14.3                        | -11.8                    | KanematsuS  | Positive    |
| hsa-miR-27b-5p   | AGAGCUUAGCUGAUGGUGAAC   | 28        | hsa-miR-27b-3p   | UUCACAGUGGCUAAGUUCUGC   | 0.0           | -11.7                        | -11.4                    | KanematsuS  | Positive    |
| hsa-miR-132-3p   | UAACAGUCUACAGCCAUUGGUC  | 632       | hsa-miR-132-5p   | ACCGUGGCUUUCGUAUUGUACU  | 2.4           | -13.0                        | -10.0                    | KanematsuS  | Positive    |
| hsa-miR-100-5p   | AACCCGUAAGUCCGAACUUCUG  | 2978      | hsa-miR-100-3p   | CAAGCUUUAUUAUAGGUUAUC   | 0.2           | -11.4                        | -12.5                    | KanematsuS  | Negative    |

|                  |                         |        |                  |                        |      |       |       |             |          |
|------------------|-------------------------|--------|------------------|------------------------|------|-------|-------|-------------|----------|
| hsa-miR-1304-3p  | UCUCACUGUAGCCUCGAACCCC  | 896    | hsa-miR-1304-5p  | UUUGAGGCUACAGUGAGAUGUG | 3.0  | -11.0 | -12.0 | KanematsuS  | Negative |
| hsa-miR-98-5p    | UGAGGUAGUAGUUUGUUAUUUU  | 69     | hsa-miR-98-3p    | CUAUACAACUUUAUCUUUCC   | 0.0  | -12.1 | -11.8 | KanematsuS  | Positive |
| hsa-miR-6850-5p  | GUGCGGAACGUGCCCGGGGCG   | 76     | hsa-miR-6850-3p  | CCCCGGCGAACGCCGACU     | 0.1  | -14.0 | -14.8 | KanematsuS  | Negative |
| hsa-miR-1296-5p  | UUAGGGCCUGGCUCCAUUC     | 50     | hsa-miR-1296-3p  | GAGUGGGGCUUCGACCCUAACC | 0.0  | -14.0 | -9.0  | KanematsuS  | Positive |
| hsa-miR-222-3p   | AGCUACAUCUGGCUACUGGGU   | 1093   | hsa-miR-222-5p   | CUCAGUAGCCAGUUGAUCCU   | 2.5  | -13.2 | -12.3 | KanematsuS  | Positive |
| hsa-miR-27a-3p   | UUCACAGUGGCUAAGUUCGCG   | 1620   | hsa-miR-27a-5p   | AGGGCUUAGCUGCUUGUGAGCA | 8.9  | -11.7 | -11.7 | KanematsuS  | Positive |
| hsa-miR-345-5p   | GCUGACUCUAGUCCAGGGCUC   | 39     | hsa-miR-345-3p   | GCUCUAAAGGAGGUCUGGAG   | 0.2  | -15.7 | -12.1 | KanematsuS  | Positive |
| hsa-miR-23a-3p   | AUCACAUUGCCAGGGAUUUC    | 1757   | hsa-miR-23a-5p   | GGGUUUCUGGGGAGUGGUAUU  | 0.9  | -11.5 | -11.4 | KanematsuS  | Positive |
| hsa-miR-141-3p   | UAACCAUGGCUUUAAGAUGG    | 2502   | hsa-miR-141-5p   | CAUCUCCAGUACAGUGUUGGA  | 14.5 | -10.2 | -10.5 | KanematsuS  | Negative |
| hsa-miR-744-5p   | UGCGGGGCUAGGGCUAACGCA   | 1858   | hsa-miR-744-3p   | CUGUUGCCAUCAACCUCAACC  | 8.2  | -11.1 | -12.9 | KanematsuS  | Negative |
| hsa-miR-374b-5p  | AUAUAAUACAACCUCUAAGU    | 47     | hsa-miR-374b-3p  | CUUAGCAGGUUUAUUUAUCU   | 0.4  | -13.0 | -10.7 | KanematsuS  | Positive |
| hsa-miR-25-3p    | CAUUGGACUUGGCUCCGUCUGA  | 3721   | hsa-miR-25-5p    | AGGGGAGACAGUUGGCUUUC   | 9.6  | -14.6 | -11.4 | KanematsuS  | Positive |
| hsa-miR-452-5p   | AACUGUUUGCAGAGGAACUGA   | 73     | hsa-miR-452-3p   | CUCAUCUGCAAGAAUAAGUG   | 0.0  | -12.4 | -10.4 | KanematsuS  | Positive |
| hsa-miR-101-3p   | UACAGUACUGUGUAACUGAA    | 641    | hsa-miR-101-5p   | CAGUUAUCAGUGUCUUCU     | 0.4  | -10.8 | -10.4 | KanematsuS  | Positive |
| hsa-miR-196a-5p  | UAGGUAGUUUAUGUUGUUGG    | 5430   | hsa-miR-196a-3p  | CGGCAACAAGAAACUCCUGAG  | 4.4  | -14.3 | -10.6 | KanematsuS  | Positive |
| hsa-miR-192-5p   | CUGACCUAUGAAUUGACAGCC   | 1060   | hsa-miR-192-3p   | CUGCCAAUCCAAGGUCACAG   | 0.3  | -13.0 | -12.0 | KanematsuS  | Positive |
| hsa-miR-7g-5p    | UGAGGUAGUAGUUUGUACAGUU  | 1986   | hsa-miR-7g-3p    | CUGUUAAGCCAGUUGGCUUUC  | 3.6  | -13.1 | -11.8 | KanematsuS  | Positive |
| hsa-miR-193a-5p  | UGGGUUCUUGCGGGCAGAUGA   | 158    | hsa-miR-193a-3p  | AACUGGGCUAACAAGUCCUGA  | 0.5  | -11.0 | -9.9  | KanematsuS  | Positive |
| hsa-miR-7e-5p    | UGAGGUAGUAGUUUAUAGUU    | 113    | hsa-miR-7e-3p    | CUAUAGCCGCUUCCUUCUCC   | 0.1  | -12.5 | -11.8 | KanematsuS  | Positive |
| hsa-miR-196b-5p  | UAGGUAGUUUCUGUUGUUGG    | 3146   | hsa-miR-196b-3p  | UCGACAGCAGCAGUCCUUC    | 0.0  | -12.1 | -10.6 | KanematsuS  | Positive |
| hsa-miR-378a-3p  | ACUGGACUUGGAGCAGAAGC    | 23492  | hsa-miR-378a-5p  | CCUCCAGUCCAGUCCUUGU    | 48.6 | -13.2 | -11.8 | KanematsuS  | Positive |
| hsa-miR-30d-5p   | UGUAAACAUCGCGCUGGAAAG   | 17255  | hsa-miR-30d-3p   | CUUUCAAGACAGUUGUUGUCG  | 0.2  | -12.4 | -11.8 | KanematsuS  | Positive |
| hsa-miR-7i-5p    | UGAGGUAGUAGUUUGUUGUU    | 353    | hsa-miR-7i-3p    | CUGCCGAAGCUCUCCUUCU    | 2.1  | -13.8 | -11.8 | KanematsuS  | Positive |
| hsa-miR-186-5p   | CAAGAAGUUUCUUUUGGGC     | 837    | hsa-miR-186-3p   | GCCCAAGGCUUUAUUUUGGG   | 1.0  | -16.3 | -11.4 | KanematsuS  | Positive |
| hsa-miR-3934-5p  | UGAGGUAGUAGUAGGAGCAG    | 356    | hsa-miR-3934-3p  | UGCUAGGUUGCAGCAGUGGGA  | 0.0  | -13.3 | -10.6 | KanematsuS  | Positive |
| hsa-miR-7a-5p    | UGAGGUAGUAGUUUAUAGUU    | 24613  | hsa-miR-7a-3p    | CUAUACAACUUCUUCUUC     | 27.9 | -12.1 | -11.8 | KanematsuS  | Positive |
| hsa-miR-1180-3p  | UUUCGGGCUCCGUGGGUGUGU   | 73     | hsa-miR-1180-5p  | GGACCCAGGCGCGGGAAUA    | 0.0  | -12.3 | -11.0 | KanematsuS  | Positive |
| hsa-miR-877-5p   | GUAGGAGGAGUUGGCGCAGG    | 525    | hsa-miR-877-3p   | UCCUUCUUCUCCUUCUCCG    | 2.5  | -10.5 | -13.1 | KanematsuS  | Negative |
| hsa-miR-140-3p   | UACACAGUUAUCCAGCACG     | 5040   | hsa-miR-140-5p   | CAGUGUUUUAAGUUGUAG     | 41.1 | -11.7 | -12.6 | KanematsuS  | Negative |
| hsa-miR-15a-5p   | UAGCAGCACAUAAGUUUGUG    | 309    | hsa-miR-15a-3p   | CAGGCCAAUUGUGGCUCCUA   | 0.2  | -11.5 | -11.7 | KanematsuS  | Negative |
| hsa-miR-7b-5p    | UGAGGUAGUAGUUUGUUGUU    | 68615  | hsa-miR-7b-3p    | CUAUACAACUUCUUCUCC     | 18.9 | -12.1 | -11.8 | KanematsuS  | Positive |
| hsa-miR-34a-5p   | UGGCAGUUCUUAAGCUGGUUG   | 54     | hsa-miR-34a-3p   | CAAUAGCAGUUAAGCUGCCU   | 0.3  | -11.7 | -13.0 | KanematsuS  | Negative |
| hsa-miR-22-3p    | AAGCCGCAUUGAAGAUCU      | 291    | hsa-miR-22-5p    | AGUUUCUUCAGUGCAAGCUUA  | 2.8  | -9.7  | -10.4 | KanematsuS  | Negative |
| hsa-miR-146a-5p  | UGAGAAGUUAUCCAGGGUU     | 111    | hsa-miR-146a-3p  | CCUUCUUAUUCAUUCUUC     | 0.1  | -14.7 | -10.5 | KanematsuS  | Positive |
| hsa-miR-21-5p    | UAGCUUAUCAGACUGAUGUGA   | 140352 | hsa-miR-21-3p    | CAACACAGGCUUAGGUGCU    | 42.6 | -11.9 | -10.1 | BurroughsAM | Positive |
| hsa-miR-30b-5p   | UGUAAACAUCUCCACUCAGC    | 29121  | hsa-miR-30b-3p   | UGGGAGGUGGUAUUUUCU     | 1.0  | -14.3 | -11.8 | BurroughsAM | Positive |
| hsa-miR-190b-5p  | UGAUUUGUUAUUAUUGGUG     | 35     | hsa-miR-190b-3p  | ACUAAUUGUCAAAUUAUCU    | 0.0  | -12.5 | -10.7 | BurroughsAM | Positive |
| hsa-miR-148a-3p  | UCAGGACACUACAGAAUCUUG   | 7202   | hsa-miR-148a-5p  | AAAGUUCUGAGACACUCCG    | 31.9 | -8.4  | -10.8 | BurroughsAM | Negative |
| hsa-miR-185-5p   | UGGAGGAAAGGCGAGUUCUGA   | 1446   | hsa-miR-185-3p   | AGGGGCUUGUUCUCCUGGUC   | 5.4  | -12.4 | -13.3 | BurroughsAM | Negative |
| hsa-miR-32-5p    | UAUUUGCAUUAUUAAGUUGCA   | 514    | hsa-miR-32-3p    | CAUUUAGUGUGUGUUAUUU    | 1.2  | -11.5 | -9.6  | BurroughsAM | Positive |
| hsa-miR-450b-5p  | UUUUGCAUUAUUAUUGCAUA    | 49     | hsa-miR-450b-3p  | UUUGGUAUUAUUAUUAUCU    | 0.0  | -10.3 | -11.0 | BurroughsAM | Negative |
| hsa-miR-143-3p   | UGAGUAGUAGGACUGUAGCUC   | 467    | hsa-miR-143-5p   | GGUUGCAGUUGCUCUUCUGU   | 0.0  | -13.8 | -11.9 | BurroughsAM | Positive |
| hsa-miR-363-3p   | AAUUGCAGGUAUCCAUUCGUA   | 167    | hsa-miR-363-5p   | CGGGUGGUAUCGAGUCAAUU   | 0.0  | -14.7 | -10.2 | BurroughsAM | Positive |
| hsa-miR-200a-3p  | UAACACUGUCUGGUAAGGUAU   | 46     | hsa-miR-200a-5p  | CAUCUACCGGAGUUGGUGGA   | 0.0  | -11.3 | -10.5 | BurroughsAM | Positive |
| hsa-miR-98-5p    | UGAGGUAGUAGUUUGUUAUUUU  | 847    | hsa-miR-98-3p    | CUAUACAACUUAUCUUUCC    | 0.0  | -12.1 | -11.8 | BurroughsAM | Positive |
| hsa-miR-33a-5p   | GUGGCUUUAAGUUGCAUUGCA   | 610    | hsa-miR-33a-3p   | CAAUUGUUCUUCUGUUAUC    | 1.9  | -10.0 | -13.1 | BurroughsAM | Negative |
| hsa-miR-27a-3p   | UUCACAGUGGCUAAGUUCG     | 9296   | hsa-miR-27a-5p   | AGGGCUUAGCUGUUGAGCA    | 82.5 | -11.7 | -11.7 | BurroughsAM | Positive |
| hsa-miR-345-5p   | GCUGACUUCUAGCCAGGGCUC   | 270    | hsa-miR-345-3p   | GCCUGAAGCAGGGGUGGAG    | 1.0  | -15.7 | -12.1 | BurroughsAM | Positive |
| hsa-miR-23a-3p   | AUCACAUUGCCAGGUAUUCC    | 2723   | hsa-miR-23a-5p   | UGGGUUCUGGGGAGGUAUUU   | 1.2  | -11.5 | -11.4 | BurroughsAM | Positive |
| hsa-miR-628-5p   | AUGCUGACAUAUUUAUAGAGG   | 38     | hsa-miR-628-3p   | UCUAGUAAAGUUGGCAUGCA   | 0.0  | -11.9 | -11.8 | BurroughsAM | Positive |
| hsa-miR-194-5p   | UGUAACAGUAGUUGUUGGUA    | 129    | hsa-miR-194-3p   | CCAGUUGGCUUCUGUUAUCG   | 0.0  | -13.8 | -12.3 | BurroughsAM | Positive |
| hsa-miR-190a-5p  | UGAUUUGUUAUUAUUAAGU     | 27     | hsa-miR-190a-3p  | CUAUUAUACAACUUAUCU     | 0.0  | -11.1 | -10.7 | BurroughsAM | Positive |
| hsa-miR-25-3p    | CAUUGCAGUUCUGGCUUCUGA   | 659    | hsa-miR-25-5p    | AGGGGAGUUCUGGGAUUUG    | 0.0  | -14.6 | -11.4 | BurroughsAM | Positive |
| hsa-miR-101-3p   | UACAGUACUGUUAACUGAA     | 3926   | hsa-miR-101-5p   | CAGUUAUCAGUGCUGAUGCU   | 16.4 | -10.8 | -10.4 | BurroughsAM | Positive |
| hsa-miR-192-5p   | CUGACCUAUGAAUUGACAGCC   | 188    | hsa-miR-192-3p   | CUGCCAAUCCAAGGUCAGAC   | 0.0  | -13.0 | -12.0 | BurroughsAM | Positive |
| hsa-miR-99b-5p   | CACCCUUAAGGCUUCCGCGG    | 3289   | hsa-miR-99b-3p   | CAAGCUGUUCUGUGGCGCG    | 13.3 | -11.2 | -13.6 | BurroughsAM | Negative |
| hsa-miR-7g-5p    | UGAGGUAGUAGUUUGUACAGUU  | 11546  | hsa-miR-7g-3p    | CUGUACAGGCUUCCUUCG     | 3.1  | -13.1 | -11.8 | BurroughsAM | Positive |
| hsa-miR-92b-3p   | UAUUUGCAGUUCGCGGCUCC    | 391    | hsa-miR-92b-5p   | AGGGGAGUUCGCGGUGCAGU   | 1.9  | -13.4 | -9.6  | BurroughsAM | Positive |
| hsa-miR-7e-5p    | UGAGGUAGGAGGUUGUUAAGUU  | 574    | hsa-miR-7e-3p    | CUAUACGGCUUCUAGCUUCC   | 0.0  | -12.5 | -11.8 | BurroughsAM | Positive |
| hsa-miR-196b-5p  | UAGGUAGUUUCUGUUGUUGG    | 4065   | hsa-miR-196b-3p  | UCGACAGCAGCAGUCCUUC    | 0.7  | -12.1 | -10.6 | BurroughsAM | Positive |
| hsa-miR-378a-3p  | ACUGGACUUGGAGGUCAGAAAGC | 19746  | hsa-miR-378a-5p  | CUCUUCAGUCCAGGUCUGU    | 7.9  | -13.2 | -11.8 | BurroughsAM | Positive |
| hsa-miR-223-3p   | UGUCAGUUUGUCAAUCCCA     | 4294   | hsa-miR-223-5p   | CGUUAUUUGCAAGCUGAGUU   | 11.5 | -12.4 | -11.5 | BurroughsAM | Positive |
| hsa-miR-30d-5p   | UGUAAACAUCGCGCUGGAAAG   | 22313  | hsa-miR-30d-3p   | CUUUCAGUACAGUUGUUCG    | 8.4  | -12.4 | -11.8 | BurroughsAM | Positive |
| hsa-miR-548ae-3p | CAAAAUCUGCAUUAUUUCA     | 42     | hsa-miR-548ae-5p | AAAAGUUAUUGUUGUUUUU    | 0.0  | -10.5 | -10.7 | BurroughsAM | Negative |
| hsa-miR-7i-5p    | UGAGGUAGUAGUUUGUUGUUGU  | 2652   | hsa-miR-7i-3p    | CUGCCGAAGCUCUCCUUCU    | 6.1  | -13.8 | -11.8 | BurroughsAM | Positive |
| hsa-miR-186-5p   | CAAGAUAUUCUUUUGGGCU     | 13326  | hsa-miR-186-3p   | GCCCAAGGUAUUUUUUGGG    | 22.9 | -16.3 | -11.4 | BurroughsAM | Positive |
| hsa-miR-548ad-5p | AAAAGUUAUUGUUGUUUUUG    | 347    | hsa-miR-548ad-3p | GAAAACGACAAUGACUUUUGA  | 0.0  | -12.4 | -10.5 | BurroughsAM | Positive |
| hsa-miR-7a-5p    | UGAGGUAGUAGUUUGUUAAGUU  | 95434  | hsa-miR-7a-3p    | CUAUACAACUUCUUCUUC     | 3.8  | -12.1 | -11.8 | BurroughsAM | Positive |
| hsa-miR-486-5p   | UCCUGUACUGAGCUGCCCGAG   | 47     | hsa-miR-486-3p   | CGGGGAGCUCAGUACAGAU    | 0.0  | -14.5 | -11.8 | BurroughsAM | Positive |
| hsa-miR-210-3p   | CUGUGCGUGGACAGCGCGUGA   | 1505   | hsa-miR-210-5p   | AGCCCUUGCCACCGCACAGU   | 7.3  | -11.8 | -12.3 | BurroughsAM | Negative |
| hsa-miR-26b-5p   | UUCAGUAUUUCAGGUAUGGU    | 1183   | hsa-miR-26b-3p   | CCUGUUCUCCAUUAUUGGU    | 4.2  | -11.5 | -11.0 | BurroughsAM | Positive |
| hsa-miR-15a-5p   | UAGCAGCACAUAAGUUGUUGU   | 2258   | hsa-miR-15a-3p   | CAGGCCAAUUGUGGCUCCUA   | 1.2  | -11.5 | -11.7 | BurroughsAM | Negative |
| hsa-miR-7b-5p    | UGAGGUAGUAGUUUGUUGUU    | 41051  | hsa-miR-7b-3p    | CUAUACAACUUCUUCUCC     | 5.1  | -12.1 | -11.8 | BurroughsAM | Positive |
| hsa-miR-22-3p    | AAGCUGCCAGUUGAAGAAUCU   | 169    | hsa-miR-22-5p    | AGUUUCUUCAGUGGCAAGUUUA | 1.2  | -9.7  | -10.4 | BurroughsAM | Negative |
| hsa-miR-146a-5p  | UGAGAUCGAAUUCUAGGGUU    | 277    | hsa-miR-146a-3p  | CCUCUGAAUUUCAGUUUCAG   | 0.0  | -14.7 | -10.5 | BurroughsAM | Positive |
| hsa-miR-450b-5p  | UUUUGCAUUAUGUUUCUGAAUA  | 59     | hsa-miR-450b-3p  | UUUGGUAACUUUGCAUCAUA   | 0.0  | -10.3 | -11.0 | KrellJ      | Negative |
| hsa-miR-143-3p   | UGAGUAGAAAGCUGUAGCUC    | 81     | hsa-miR-143-5p   | GGUGGAGUUCGUUCUUCUGU   | 0.0  | -13.8 | -11.9 | KrellJ      | Positive |
| hsa-miR-27b-5p   | AGAGCUUAAGCUGUUGGUGAAC  | 40     | hsa-miR-27b-3p   | UUCACAGGGCUUAGUUCUGC   | 0.0  | -11.7 | -11.4 | KrellJ      | Positive |
| hsa-miR-411-5p   | UAGUAGACCGUUAAGCUGUAG   | 82     | hsa-miR-411-3p   | UAUUGUACAGCUGCCAUACC   | 0.6  | -10.1 | -10.7 | KrellJ      | Negative |
| hsa-miR-660-5p   | UAACCAUUGCAUAUCGGAGUUG  | 385    | hsa-miR-660-3p   | ACCUUCUUGGAGUUAUUUA    | 1.0  | -12.3 | -10.8 | KrellJ      | Positive |
| hsa-miR-584-5p   | UUUUGUUUGCCUGGGACUGAG   | 742    | hsa-miR-584-3p   | UCAGUUCAGGCCAACAGGCU   | 2.0  | -8.8  | -9.3  | KrellJ      | Negative |
| hsa-miR-98-5p    | UGAGGUAGUAGUUUGUUAUUUU  | 2997   | hsa-miR-98-3p    | CUAUACAACUUAUCUUUCC    | 0.0  | -12.1 | -11.8 | KrellJ      | Positive |
| hsa-miR-3158-3p  | AAAGGCUUCUUCUGGACAGCAG  | 543    | hsa-miR-3158-5p  | CCUGCAGAGAGGAACUUUC    | 0.2  | -14.8 | -10.0 | KrellJ      | Positive |
| hsa-miR-222-3p   | AGCUACAUCUGGCUACUGGU    | 16726  | hsa-miR-222-5p   | CCUGUAGGAGGAGUAGUUCU   | 38.3 | -13.2 | -12.3 | KrellJ      | Positive |
| hsa-miR-27a-3p   | UUCACAGUGGCUAAGUUCG     | 14162  | hsa-miR-27a-5p   | AGGGUUAAGCUGUUGGAGCA   | 95.0 | -11.7 | -11.7 | KrellJ      | Positive |
| hsa-miR-345-5p   | GCUGACUUCUAGUCCAGGGCUC  | 290    | hsa-miR-345-3p   | GCCUGAACGAGGGUUCUGGAG  | 1.0  | -15.7 | -12.1 | KrellJ      | Positive |
| hsa-miR-23a-3p   | AUCACAUUCGAGGAAUUC      | 660    | hsa-miR-23a-5p   | GGGGUUCUGGGGAGGUAUUU   | 3.0  | -11.5 | -11.4 | KrellJ      | Positive |
| hsa-miR-381-3p   | UAUAACAAGGCAAGCUCUCU    | 52     | hsa-miR-381-5p   | AGCGGAGUCCUUAUUUAUU    | 0.0  | -13.8 | -11.6 | KrellJ      | Positive |

|                  |                         |        |                  |                        |       |       |       |          |          |
|------------------|-------------------------|--------|------------------|------------------------|-------|-------|-------|----------|----------|
| hsa-miR-1287-5p  | UGCUGGAUCAGUGGUUUCGAGUC | 60     | hsa-miR-1287-3p  | CUCUAGCCACAGUUCGAGU    | 0.0   | -12.2 | -12.7 | KrellJ   | Negative |
| hsa-miR-194-5p   | UGUAAACAGCAACUUCAGUGGGA | 78     | hsa-miR-194-3p   | CCAGUGGGGUCUGUUUAUCUG  | 0.4   | -13.8 | -12.3 | KrellJ   | Positive |
| hsa-miR-937-3p   | AUCCGGCUCUGACUCUCGCC    | 41     | hsa-miR-937-5p   | GUGAGUCAGGGUGGGUCUG    | 0.0   | -12.3 | -12.2 | KrellJ   | Positive |
| hsa-miR-744-5p   | UGCGGGGUCAGGGUUAACAGCA  | 2556   | hsa-miR-744-3p   | CUGUUGCCACUAAACUACAC   | 4.7   | -11.1 | -12.9 | KrellJ   | Negative |
| hsa-miR-651-5p   | UUUAGGAUUAAGCUUACUUUUG  | 28     | hsa-miR-651-3p   | AAAGGAAAGUUAUCCUAAAAG  | 0.0   | -11.5 | -10.2 | KrellJ   | Positive |
| hsa-miR-25-3p    | CAUUGCAUCUGUCUGCGUCUGA  | 13311  | hsa-miR-25-5p    | AGGCGGAGACUUGGGCAAUUG  | 78.4  | -14.6 | -11.4 | KrellJ   | Positive |
| hsa-miR-1910-5p  | CCAGUCUUGUCUCUCCGCCUCC  | 295    | hsa-miR-1910-3p  | GAGGCAAGGACAGGUAUGACA  | 2.6   | -13.7 | -10.8 | KrellJ   | Positive |
| hsa-miR-130a-3p  | CAGUGCAUUGUAAAAGGGCAU   | 695    | hsa-miR-130a-5p  | GCUCUUUACAUUUGUCUACU   | 0.0   | -12.0 | -12.6 | KrellJ   | Negative |
| hsa-miR-101-3p   | UACAGUAGUCUGUUAUCUGAA   | 2608   | hsa-miR-101-5p   | CAGUUAUCACAGUCUUCUACU  | 2.7   | -10.8 | -10.4 | KrellJ   | Positive |
| hsa-miR-5480-3p  | CCAAAACUCGAGUUAUUUUGC   | 162    | hsa-miR-5480-5p  | AAAAGUAAUUGCGUUUUUGCC  | 0.0   | -10.5 | -11.9 | KrellJ   | Negative |
| hsa-miR-196a-5p  | UAGGUAGUUAUGUUGUUGGG    | 837    | hsa-miR-196a-3p  | CGGCAACAAGAAUCGCCUGAG  | 5.5   | -14.3 | -10.6 | KrellJ   | Positive |
| hsa-miR-192-5p   | CUGACCUAUGAAUUGACAGCC   | 2049   | hsa-miR-192-3p   | CUGCCAAUCCAUAGGUCAACAG | 0.0   | -13.0 | -12.0 | KrellJ   | Positive |
| hsa-miR-99b-5p   | CACCCUGAGAACCACCUUGCG   | 13597  | hsa-miR-99b-3p   | CAAGCUUGUUCUGUGGGUCGG  | 129.5 | -11.2 | -13.6 | KrellJ   | Negative |
| hsa-miR-1468-5p  | CUCCGUUUGCCUUUCGUCUG    | 113    | hsa-miR-1468-3p  | AGCAAAUUAAGCAAUUGAAAA  | 0.0   | -13.0 | -12.4 | KrellJ   | Positive |
| hsa-miR-548az-5p | CAAAAGUAAUUGUGUUUUUGC   | 37     | hsa-miR-548az-3p | AAAACUCGCAUACUUUUGC    | 0.0   | -10.3 | -11.7 | KrellJ   | Negative |
| hsa-let-7g-5p    | UGAGGUAGUAGUUUGUACAGUU  | 5388   | hsa-let-7g-3p    | CUGUACAGGCCACUCCUUGC   | 2.0   | -13.1 | -11.8 | KrellJ   | Positive |
| hsa-miR-92b-3p   | UAUUGCACUCUGUCUCCGCCUCC | 21751  | hsa-miR-92b-5p   | AGGGCAGGACCGGUGCAGUG   | 18.0  | -13.4 | -9.6  | KrellJ   | Positive |
| hsa-let-7e-5p    | UGAGGUAGGAGGUUUGUUAUUG  | 1908   | hsa-let-7e-3p    | CUAUACGGCCUUCUAGCUUCC  | 8.9   | -12.5 | -11.8 | KrellJ   | Positive |
| hsa-miR-196b-5p  | UAGGUAGUUAUCUUGUUGGG    | 386    | hsa-miR-196b-3p  | UCGACAGCACAGACUCCUUC   | 3.6   | -12.1 | -10.6 | KrellJ   | Positive |
| hsa-miR-378a-3p  | ACUGGACUUGGAGUCAGAGGC   | 19886  | hsa-miR-378a-5p  | CUCUUGACUCCAGGUCUUGU   | 18.3  | -13.2 | -11.8 | KrellJ   | Positive |
| hsa-miR-31-5p    | AGGCAAGUCGUCGUAUAGCU    | 19781  | hsa-miR-31-3p    | UGCUUAGCCAAUUAUUGCAU   | 31.0  | -11.7 | -14.3 | KrellJ   | Negative |
| hsa-let-7i-5p    | UGAGGUAGUAGUUUGUUGUUU   | 15387  | hsa-let-7i-3p    | CUGCCAAUCCAUAGGUCAACU  | 1.8   | -13.8 | -11.8 | KrellJ   | Positive |
| hsa-miR-186-5p   | CAAGAUAUUCUUUUUGGGCU    | 8241   | hsa-miR-186-3p   | GCCTAAAGGUAUUUUUGGG    | 0.4   | -16.3 | -11.4 | KrellJ   | Positive |
| hsa-miR-29a-3p   | UAGCACCACUAGAAUUCGUUA   | 2915   | hsa-miR-29a-5p   | ACUGAUUUUUUGGUGUCCAG   | 18.2  | -11.1 | -10.5 | KrellJ   | Positive |
| hsa-miR-548ad-5p | AAAAGUAAUUGUGUUUUUGC    | 269    | hsa-miR-548ad-3p | AAAACGACAAUAGUUAUUGCA  | 0.0   | -12.4 | -10.5 | KrellJ   | Positive |
| hsa-let-7a-5p    | UGAGGUAGUAGUUUGUUAUUG   | 27760  | hsa-let-7a-3p    | CUAUACAAUUAUUCUUCUUC   | 10.8  | -12.1 | -11.8 | KrellJ   | Positive |
| hsa-miR-486-5p   | UCCUGUACUGAGUCGCCCGAG   | 473    | hsa-miR-486-3p   | CGGGCAGCUCAGUACAGGAU   | 0.5   | -14.5 | -11.8 | KrellJ   | Positive |
| hsa-miR-1180-3p  | UUUCGGGUCUGGUGGGUUGU    | 529    | hsa-miR-1180-5p  | GGACCCACCCGGCCGGAAUA   | 1.1   | -12.3 | -11.0 | KrellJ   | Positive |
| hsa-miR-15a-5p   | UAGCAGCAGUUAUUGUUGGG    | 413    | hsa-miR-15a-3p   | CAGGCAUAUUUGGUGGCUCA   | 0.2   | -11.5 | -11.7 | KrellJ   | Negative |
| hsa-let-7b-5p    | UGAGGUAGUAGUUUGUGUGUU   | 1284   | hsa-let-7b-3p    | CUAUACAAUUCUAGCUUCC    | 5.1   | -12.1 | -11.8 | KrellJ   | Positive |
| hsa-miR-548am-5p | AAAAGUAAUUGCGUUUUUGC    | 37     | hsa-miR-548am-3p | CAAAACUCGACUUCUUCUUC   | 0.0   | -10.7 | -10.5 | KrellJ   | Positive |
| hsa-miR-22-3p    | AAGCUGCCAGUUAAGAUCUGU   | 14649  | hsa-miR-22-5p    | AGUUCUUCAGUGGCAAGCUUA  | 6.3   | -9.7  | -10.4 | KrellJ   | Negative |
| hsa-miR-21-5p    | UAGCUUAUCAGACUGAUGUGA   | 22840  | hsa-miR-21-3p    | CAACCCAGUCGAUGGGUCUG   | 2.7   | -11.9 | -10.1 | ClaudiaC | Positive |
| hsa-miR-30b-5p   | UGUAAACUCCACACUACAGCU   | 4326   | hsa-miR-30b-3p   | CUGGGUUGGAGUUGGUGUUC   | 5.2   | -14.3 | -11.8 | ClaudiaC | Positive |
| hsa-miR-148a-3p  | UCAGUGCACUACAGAAUUCUG   | 7297   | hsa-miR-148a-5p  | AAAGUUCAGAGACUCGCCAG   | 64.3  | -8.4  | -10.8 | ClaudiaC | Negative |
| hsa-miR-185-5p   | UGGAGAGAAAGGCAUUCUGU    | 680    | hsa-miR-185-3p   | AGGGUUGGCUUUCUUGGUC    | 3.0   | -12.4 | -13.3 | ClaudiaC | Negative |
| hsa-miR-32-5p    | UAUUGCACAUUAUUAUUGCA    | 1743   | hsa-miR-32-3p    | CAUUUAGUGUGUGUUAUUU    | 8.9   | -11.5 | -9.6  | ClaudiaC | Positive |
| hsa-miR-450b-5p  | UUUUGCAAUUAUUCUGAAUA    | 149    | hsa-miR-450b-3p  | UUUGGAUCAUUUGCAUCAUA   | 0.3   | -10.3 | -11.0 | ClaudiaC | Negative |
| hsa-miR-143-3p   | UGAGAUAGACACUAGUCUC     | 38     | hsa-miR-143-5p   | GGUGUUGGUCUGUUCUUGGU   | 0.0   | -13.8 | -11.9 | ClaudiaC | Positive |
| hsa-miR-548d-3p  | CAAAAACCAAGUUAUUUUUGC   | 37     | hsa-miR-548d-5p  | AAAAGUAAUUGGUUUUUGCC   | 0.0   | -10.5 | -10.5 | ClaudiaC | Positive |
| hsa-miR-363-3p   | AAUUGCAGGUAUUCUUCUGA    | 3366   | hsa-miR-363-5p   | CGGGUAGUACAGCAUUAUUG   | 4.5   | -14.7 | -10.2 | ClaudiaC | Positive |
| hsa-miR-1304-5p  | UUUGAGGCUACAGUGAUGAU    | 70     | hsa-miR-1304-3p  | UCUACUGUAGCCUCGACCC    | 0.0   | -12.0 | -11.0 | ClaudiaC | Positive |
| hsa-miR-98-5p    | UGAGGUAGUAGUUUGUUAUUG   | 3850   | hsa-miR-98-3p    | CUAUACAACUUAUUCUUC     | 0.0   | -12.1 | -11.8 | ClaudiaC | Positive |
| hsa-miR-320a-3p  | AAAAGCUGGGUAGAGAGGGCA   | 5896   | hsa-miR-320a-5p  | CCUUUCUUCUCCGGUUUCUUC  | 0.2   | -12.0 | -10.3 | ClaudiaC | Positive |
| hsa-miR-195-5p   | UAGCAGCAGAAAUAUUGGC     | 48     | hsa-miR-195-3p   | CCAAUAUUGGUCUGUCUCC    | 0.4   | -11.5 | -11.7 | ClaudiaC | Negative |
| hsa-miR-27a-3p   | UUACAGUGGCUAAGUUCGCC    | 1703   | hsa-miR-27a-5p   | AGGGUUAUGUCUUGUGAGCA   | 3.9   | -11.7 | -11.7 | ClaudiaC | Positive |
| hsa-miR-345-5p   | GUCGACUUCUAGUCCAGGGCUC  | 888    | hsa-miR-345-3p   | GCCUUGAACGAGGGUUCGGG   | 1.1   | -15.7 | -12.1 | ClaudiaC | Positive |
| hsa-miR-23a-3p   | AUCACAUUGCCAGGAAUUC     | 888    | hsa-miR-23a-5p   | GGGUUUCUGGGUUGGAAUU    | 0.4   | -11.5 | -11.4 | ClaudiaC | Positive |
| hsa-miR-194-5p   | UGUAAACAGCAACUACUUGGA   | 194    | hsa-miR-194-3p   | CCAGUUGGGUCUGUUUAUCUG  | 0.5   | -13.8 | -12.3 | ClaudiaC | Positive |
| hsa-miR-25-3p    | CAUUGCAUUGUCUCGUCUUGA   | 2489   | hsa-miR-25-5p    | AGGCGGAGACUUGGGCAAUUG  | 7.2   | -14.6 | -11.4 | ClaudiaC | Positive |
| hsa-miR-101-3p   | UACAGUAGUUAUCUUCUGAA    | 2822   | hsa-miR-101-5p   | CAGUUAUCACAGUCUUCUUC   | 4.5   | -10.8 | -10.4 | ClaudiaC | Positive |
| hsa-miR-5480-3p  | CCAAAACUCGAGUUAUUUUGC   | 25     | hsa-miR-5480-5p  | AAAAGUAAUUGCGUUUUUGCC  | 0.0   | -10.5 | -11.9 | ClaudiaC | Negative |
| hsa-miR-196a-5p  | UAGGUAGUUAUUAUUGUUGGG   | 5025   | hsa-miR-196a-3p  | CGGCAACAAGAAUCGCCUGAG  | 37.3  | -14.3 | -10.6 | ClaudiaC | Positive |
| hsa-miR-192-5p   | CUGACCUAUGAAUUGACAGCC   | 410    | hsa-miR-192-3p   | CUGCCAAUCCAUAGGUACAG   | 1.2   | -13.0 | -12.0 | ClaudiaC | Positive |
| hsa-miR-99b-5p   | CACCCUGAGAACCACCUUGCG   | 974    | hsa-miR-99b-3p   | CAAGCUUGUUCUGUGGGUCGG  | 5.1   | -11.2 | -13.6 | ClaudiaC | Negative |
| hsa-let-7g-5p    | UGAGGUAGUAGUUUGUACAGUU  | 18104  | hsa-let-7g-3p    | CUGUACAGGCCACUCCUUGC   | 3.1   | -13.1 | -11.8 | ClaudiaC | Positive |
| hsa-miR-183-5p   | UAUGGACUGUAGAAUUCACU    | 15792  | hsa-miR-183-3p   | GUGAAUUAACGAGGGCAAUA   | 106.8 | -12.3 | -10.0 | ClaudiaC | Positive |
| hsa-let-7e-5p    | UGAGGUAGGAGGUUUGUUAUUG  | 378    | hsa-let-7e-3p    | CUAUACGGCCUUCUAGCUUCC  | 0.5   | -12.5 | -11.8 | ClaudiaC | Positive |
| hsa-miR-196b-5p  | UAGGUAGUUAUCUUGUUGGG    | 819    | hsa-miR-196b-3p  | UCGACAGCAGACUCCUUC     | 0.2   | -12.1 | -10.6 | ClaudiaC | Positive |
| hsa-miR-378a-3p  | ACUGGACUUGGAGUCAGAGGC   | 110646 | hsa-miR-378a-5p  | CCUUCUAGUCCAGGUCUUGU   | 15.8  | -13.2 | -11.8 | ClaudiaC | Positive |
| hsa-miR-30d-5p   | UGUAAACUCCCGACUGGAAG    | 12844  | hsa-miR-30d-3p   | CUUUCAGUCAGAUUUUACUUC  | 4.3   | -12.4 | -11.8 | ClaudiaC | Positive |
| hsa-miR-548ae-3p | CAAAAACUCGAAUUAUUUCA    | 55     | hsa-miR-548ae-5p | AAAAGUAAUUGGUUUUUG     | 0.0   | -10.5 | -10.7 | ClaudiaC | Negative |
| hsa-let-7i-5p    | UGAGGUAGUAGUUUGUUGUU    | 1841   | hsa-let-7i-3p    | CUGCCAAUCCAUAGGUCAAC   | 6.6   | -13.8 | -11.8 | ClaudiaC | Positive |
| hsa-miR-186-5p   | CAAGAUAUUCUUUUGGGCU     | 9209   | hsa-miR-186-3p   | GCCTAAAGGUAUUUUUGGG    | 8.7   | -16.3 | -11.4 | ClaudiaC | Positive |
| hsa-miR-3934-5p  | UCAGGUGUGAAACUGAGGCAG   | 44     | hsa-miR-3934-3p  | UGCUCAGGUUGCAGCUGGGA   | 0.0   | -13.3 | -10.6 | ClaudiaC | Positive |
| hsa-miR-548ad-5p | AAAAGUAAUUGUGUUUUUG     | 683    | hsa-miR-548ad-3p | GAAAACGACAAUAGUUAUUGCA | 0.0   | -12.4 | -10.5 | ClaudiaC | Positive |
| hsa-let-7a-5p    | UGAGGUAGUAGUUUGUUAUUG   | 110764 | hsa-let-7a-3p    | CUAUACAUAUACUUGCUUUC   | 34.6  | -12.1 | -11.8 | ClaudiaC | Positive |
| hsa-miR-877-5p   | GUAGAGGAGUUGCGCAGGG     | 403    | hsa-miR-877-3p   | UCCUUCUUCUCCUCCUCCAG   | 1.3   | -10.5 | -13.1 | ClaudiaC | Negative |
| hsa-miR-26b-5p   | UUCAGUAAUUCAGGAUAGU     | 3552   | hsa-miR-26b-3p   | CCUGUUCUCCAUACUUGGU    | 1.1   | -11.5 | -11.0 | ClaudiaC | Positive |
| hsa-miR-15a-5p   | UAGCAGCACAUAUUGGUUUGA   | 2863   | hsa-miR-15a-3p   | CAGGCCAAUUGUGUCGCCUA   | 6.2   | -11.5 | -11.7 | ClaudiaC | Negative |
| hsa-miR-15b-5p   | UAGCAGCACAUCAGGUUAUCA   | 5230   | hsa-miR-15b-3p   | CGAAUUAUUUUGGUCUCUA    | 0.0   | -12.0 | -11.7 | ClaudiaC | Positive |
| hsa-miR-4446-3p  | CAGGGCUGGCAUGACUUGGU    | 44     | hsa-miR-4446-5p  | AUUUCCUGCCAUUCCUUGCC   | 0.2   | -8.9  | -12.2 | ClaudiaC | Negative |
| hsa-let-7b-5p    | UGAGGUAGUAGUUUGUUGUU    | 14501  | hsa-let-7b-3p    | CUAUACAACCUACUCCUCC    | 2.3   | -12.1 | -11.8 | ClaudiaC | Positive |
| hsa-miR-2276-3p  | UCUGCAAGUUGCGAGGCGAG    | 34     | hsa-miR-2276-5p  | GCCTUUCUCCUUCGAGCAG    | 0.1   | -13.9 | -13.1 | ClaudiaC | Positive |
| hsa-miR-548am-5p | AAAAGUAAUUGCGUUUUUGCC   | 45     | hsa-miR-548am-3p | CAAAUCUGCAGUUAUUUUGU   | 0.0   | -10.7 | -10.5 | ClaudiaC | Positive |
| hsa-miR-146a-5p  | UGAAGACUAGAAUUCAGGGUU   | 127    | hsa-miR-146a-3p  | CCUUCAGAAUUCAGUUCUUCAG | 0.0   | -14.7 | -10.5 | ClaudiaC | Positive |

## Supplementary Note 4 In-vivo knockdown assays

In main test Fig. 5b, we described correlations between NucleicNet Score Q and in vivo knockdown levels of commercially available shRNAs. The shRNA sequence are collected from <http://www.sigmaaldrich.com/life-science/functional-genomics-and-rnai.html>.

In Supplementary Table 5, we listed sequence and score for the shRNA tested. In Supplementary Figure 9, we detailed on both positive and negative correlations for each cell line and gene.

### Supplementary Table 5 Details concerning all the tested shRNA.

| GENE      | Cell Line | Mean KnockDown Level | shRNA sequence         | NucleicNet Score Q |
|-----------|-----------|----------------------|------------------------|--------------------|
| RPL8      | 293T/17   | 0.94                 | CCAGUUUGUGUUAUUGCGGCAA | -11.8267           |
| RPL8      | 293T/17   | 0.85                 | GCGUACCACAAUUAAGGCA    | -12.9994           |
| RPL8      | 293T/17   | 0.96                 | AGGGAACUAUGCCACCGUUU   | -9.63753           |
| RPL8      | 293T/17   | 0.98                 | CCGAAUUGACAAACCAUCUU   | -9.54938           |
| RPL35     | 293T/17   | 0.94                 | GCCCGUGUUCUCACAGUUUU   | -9.52501           |
| RPL35     | 293T/17   | 0.87                 | GCCUAAGAAGACACGUGCCAU  | -11.5037           |
| RPL35     | 293T/17   | 0.95                 | GUUUAUAAACAGACUCAGAAA  | -8.96463           |
| RPL35     | 293T/17   | 0.82                 | CGGAAAUCCAUUGCCGUGUU   | -9.03227           |
| RPS6      | 293T/17   | 0.95                 | AUGAACGCAAAUCUGUACU    | -9.60381           |
| RPS6      | 293T/17   | 0.82                 | UACUUUCUAUGAGAAGCGU    | -11.7128           |
| TMSB10    | 293T/17   | 0.58                 | CUGCCGACCAAAGAGACCAU   | -12.04             |
| TMSB10    | 293T/17   | 0.91                 | CAGGAGAAGCGGAGUGAAUU   | -9.81594           |
| TMSB10    | 293T/17   | 0.72                 | GCCGACCAAAGAGACCAUUGA  | -11.2693           |
| FTL       | 293T/17   | 0.75                 | CUGGAGACUCACUCCUAGAU   | -8.50851           |
| FTL       | 293T/17   | 0.85                 | GCUACUCUCAAGCAGACUA    | -11.3769           |
| FTL       | 293T/17   | 0.56                 | CCUGGUCAAUUUGUACCGCA   | -11.2377           |
| FTL       | 293T/17   | 0.57                 | GACAUCAAGAAGCCAGCUGAA  | -10.9225           |
| RPL32     | 293T/17   | 0.78                 | GCAUUGACAACAGGGUUCGUA  | -12.2272           |
| RPL32     | 293T/17   | 0.9                  | CCAGAUCUUGAUGCCCAACAU  | -9.69889           |
| RPL32     | 293T/17   | 0.91                 | GCUGAUGUCAACAAUUCUUA   | -12.3143           |
| RPL32     | 293T/17   | 0.91                 | CAGGGUUCGUGAAGAUUCAA   | -12.5952           |
| HSP90B1   | 293T/17   | 0.67                 | CGACGAAUUAAGGAAGAUAA   | -12.3826           |
| HSP90B1   | 293T/17   | 0.9                  | CGUGGUCUGUUGACGAAUUA   | -10.5979           |
| HSP90B1   | 293T/17   | 0.96                 | CCUGUGGAUGAAUACUGUUAU  | -9.2634            |
| LDHB      | A549      | 0.81                 | GCGUUAUCAACAGAGCUAA    | -13.1236           |
| LDHB      | A549      | 0.96                 | CGUGAUUGGAAGUGGAUGUAA  | -12.1517           |
| LDHB      | A549      | 0.92                 | GCUUUAUUUCUUCAGCACCUA  | -13.1645           |
| RPS19     | A549      | 0.93                 | CAGCAGGAGUUCGUCAGAGCU  | -11.3013           |
| RPS19     | A549      | 0.73                 | ACGUCAGAGAAACGGCGUCAU  | -12.02             |
| PCNA      | A549      | 0.94                 | GAUGCUGUUGUAAUUUCCUGU  | -9.55302           |
| PCNA      | A549      | 0.64                 | ACGUCUUCUUGGUGCAGCUC   | -13.4277           |
| SAT1      | A549      | 0.92                 | CGACAAGGAGUACUUGCUAAA  | -9.83653           |
| SAT1      | A549      | 0.88                 | GCUUUGGCAUAGGAUCAGAAA  | -10.0862           |
| SAT1      | A549      | 0.58                 | GCUGGCUAAAUAUGAAUACAU  | -11.9129           |
| CCT7      | A549      | 0.99                 | GCCAAAGUUGUCUUGUCCAAA  | -10.7139           |
| CCT7      | A549      | 0.87                 | GCAAAGACUUUGGUGACAUU   | -10.945            |
| CCT7      | A549      | 0.99                 | GCUGAGUGGAACAUCUCUUAU  | -8.74034           |
| CCT7      | A549      | 0.97                 | GCCACAUAUUGAAACUUCUU   | -11.1126           |
| HIST1H2BK | A549      | 0.77                 | CAUGGGAAUCAUGAACCCUU   | -11.6108           |
| HIST1H2BK | A549      | 0.84                 | GUCGGAAGAAAGCCGUGACUA  | -11.0131           |
| HIST1H2BK | A549      | 0.8                  | CUCCUUCGUCACGACAUUCU   | -11.921            |
| HIST1H2BK | A549      | 0.96                 | CAAGGAGAGCUCUCCGUUAU   | -9.01864           |
| PSMB4     | A549      | 0.59                 | GUGUUGAAUAGAGGGACCAU   | -13.3452           |
| PSMB4     | A549      | 0.97                 | UGCGAGUCAACAACAGUACCA  | -12.5195           |
| PSMB4     | A549      | 0.95                 | CCGCAACAUUCUCGCAUUAU   | -9.7044            |
| ACTB      | A549      | 0.9                  | CGAGAAGAUAGCCAGAUCAU   | -11.3411           |
| ACTB      | A549      | 0.89                 | CGAAACUACUUAACUCCAU    | -11.6118           |
| ACTB      | A549      | 0.5                  | CGUGCGUGACAUUAAGGAGAA  | -12.4879           |
| PRKG1     | A549      | 0.6                  | CCAGUCUUUCUAGAAUUAU    | -12.1505           |
| PRKG1     | A549      | 0.58                 | GGCUCAUUCGAAUUAUUAU    | -9.68784           |
| PRKG1     | A549      | 0.53                 | CAGAAACUUUAAGGACAGCAA  | -12.7322           |
| PRKG1     | A549      | 0.69                 | CAUCAGCAAAGGAACGGUAAA  | -10.5396           |
| CANX      | A549      | 0.94                 | CGUGAAAUUGAGGACCCAGAA  | -10.1993           |
| CANX      | A549      | 0.97                 | GCUGAUCGAAAGAAUAGUUAU  | -10.2576           |



|           |          |      |                        |          |
|-----------|----------|------|------------------------|----------|
| CANX      | A549     | 0.92 | CCUGGAUCAGUCCAUGACAA   | -10.9829 |
| CANX      | A549     | 0.84 | GCCAAGAAAGACGAUACCGAU  | -10.9449 |
| CSE1L     | A549     | 0.69 | CCUGGGUUAUAGGUUUCUUU   | -11.1077 |
| CSE1L     | A549     | 0.96 | GCAUGGAAUACACAAGCAA    | -11.4032 |
| CSE1L     | A549     | 0.76 | CCGUAUGAAUUUAAGUCAAA   | -12.0493 |
| CSE1L     | A549     | 0.91 | CGCUGACAAGUAUCUGUGAAA  | -9.16559 |
| HNRNPA2B1 | A549     | 0.6  | AGAAGCUGUUUUGUGCGGAA   | -11.7392 |
| HNRNPA2B1 | A549     | 0.68 | UGACAACUAUGGAGGAGGAAA  | -11.7771 |
| HNRNPA2B1 | A549     | 0.78 | CAGAAUACCAUACCAUCAU    | -9.22553 |
| SRSF1     | A549     | 0.5  | ACUGCCUACAUCCGGUUAAA   | -11.3913 |
| SRSF1     | A549     | 0.73 | ACUUACCUCCAGACAUCCGAA  | -10.4475 |
| SRSF1     | A549     | 0.91 | GAAGCAGGUGAUGUAUGUUU   | -9.84536 |
| RPL24     | Hepa 1-6 | 0.81 | CCUCUACAGAAGGAAACACAA  | -13.0854 |
| RPL24     | Hepa 1-6 | 0.92 | CUGGUGCAUCUUCUGUGAUA   | -9.93039 |
| RPL24     | Hepa 1-6 | 0.94 | GAGUCAGCAUUCUUUCCAAA   | -9.63928 |
| RPL24     | Hepa 1-6 | 0.89 | UGGUGCAUCUCUUCUGUGAUA  | -9.98618 |
| RPL24     | Hepa 1-6 | 0.86 | GCCAGGACCCAGGGGAAAGUU  | -12.5817 |
| PHB2      | Hepa 1-6 | 0.66 | CCCAGCAUGUACCAAGCUCUA  | -12.6074 |
| PHB2      | Hepa 1-6 | 0.91 | GCUGACAACCUUGUGUGAUA   | -9.06354 |
| PHB2      | Hepa 1-6 | 0.83 | CUGAGCAGAAUCCUGGCUAU   | -10.4762 |
| PHB2      | Hepa 1-6 | 0.92 | GCCUCAUUAAGGGUAAGAAA   | -9.64075 |
| CKB       | MCF7     | 0.57 | GCAACAUGAAGGAGGUGUUA   | -13.0122 |
| CKB       | MCF7     | 0.66 | CCGCGGUAUCUGGCACAAUGA  | -11.6477 |
| CKB       | MCF7     | 0.89 | CCCAGAUUGAAACUCUCUUA   | -10.111  |
| CKB       | MCF7     | 0.5  | CUCUUAAGUCUAAGGACUUA   | -12.3354 |
| PRDX2     | MCF7     | 0.94 | CCUUCGCGAGAUACUGUUAA   | -10.3144 |
| PRDX2     | MCF7     | 0.74 | CAGACGCUUGUCUGAGGAUA   | -11.8619 |
| PRDX2     | MCF7     | 0.86 | GCCUUGCAGUACAGAUUA     | -11.2211 |
| PRDX2     | MCF7     | 0.97 | GUGAAGCUGUCGACUACAAA   | -10.8086 |
| FHIT      | MCF7     | 0.88 | GCUGGAGACUUCACAGGAU    | -9.8901  |
| FHIT      | MCF7     | 0.84 | CCUCUGUAGUGUUUCUCAA    | -9.37324 |
| FHIT      | MCF7     | 0.58 | GUGAAUAGGAAACCUUGGUA   | -10.4632 |
| NUCKS1    | MCF7     | 0.96 | CGGCAUCUAAAGCAGCUUA    | -11.8993 |
| NUCKS1    | MCF7     | 0.94 | CACUCAGCAGAGUAUGUGAA   | -11.3989 |
| NUCKS1    | MCF7     | 0.65 | CCAAAACCAAGAUAAAGGCUA  | -13.1837 |
| NUCKS1    | MCF7     | 0.99 | GUUGUUGAUUACACAGUUU    | -10.1923 |
| RPS4X     | 293T/17  | 0.98 | GCCAAGUACAAGUUGUCAAA   | -11.0255 |
| RPS4X     | 293T/17  | 0.76 | GUUCACGUGAAAGAUCCAAU   | -10.9654 |
| RP55      | 293T/17  | 0.67 | GCAGGUAUACAUUGCAGUGAA  | -11.3992 |
| RP55      | 293T/17  | 0.86 | ACCGAUGAUGUGCAGAUCAA   | -11.5075 |
| RP55      | 293T/17  | 0.54 | CGGAACAUAAGACCAUUGCU   | -10.1713 |
| ATP5B     | A549     | 0.54 | GCUGGUAUUAUGGUCAAUGAA  | -11.1534 |
| ATP5B     | A549     | 0.98 | GCACAGUAAGGACUAUUGCUA  | -11.1471 |
| H2AFZ     | A549     | 0.79 | CCGUUAUACGACACCUAAA    | -9.38245 |
| H2AFZ     | A549     | 0.95 | GUACUUGAACUGGCAGGAAU   | -9.44338 |
| H2AFZ     | A549     | 0.9  | CCACAAUCUCUGAUUGGGAA   | -10.8854 |
| PRDX1     | A549     | 0.6  | CCAUGAACAUUCUUUGGUUA   | -9.23266 |
| PRDX1     | A549     | 0.99 | GAUGAGACUUGAGACUAGUU   | -11.0847 |
| PRDX1     | A549     | 0.98 | CCAGAUUGGUCAGUUUAAGAU  | -10.0918 |
| PRDX1     | A549     | 0.97 | GCUUUCAGUGAUGGGCAGAA   | -12.7969 |
| PRDX1     | A549     | 0.83 | CCUGUCUGACUACAAAGGAAA  | -11.4605 |
| PKM       | A549     | 0.99 | GUUCGGAGGUUUGAUGAAUC   | -11.4224 |
| PKM       | A549     | 0.97 | GCCCGAGGCUUCUCAAGAAG   | -10.9108 |
| PKM       | A549     | 0.59 | CGGGUGAACUUGCCAUGAAU   | -8.33096 |
| HSPA8     | A549     | 0.68 | GCCCGAUUGAAGAACUGAAU   | -9.81473 |
| HSPA8     | A549     | 0.96 | GCAACUGUUGAAGAUAGAAA   | -10.8063 |
| HSPA8     | A549     | 0.92 | CCAAGACUUCUCAUGGAAA    | -10.788  |
| HSPA8     | A549     | 0.58 | CCUGAUGAAGCUGUUGCUUA   | -11.5672 |
| HSPA8     | A549     | 0.55 | CCACCAUUGAAGAGGUUGAUU  | -10.2738 |
| NPM1      | A549     | 0.96 | GCGCCAGUGAAGAAUCUAUA   | -10.8987 |
| NPM1      | A549     | 0.64 | GCCGACAAAGAUUAUCACUUU  | -10.6747 |
| NPM1      | A549     | 0.93 | CCUAGUUCUGUAGAAGACAUU  | -11.7931 |
| NPM1      | A549     | 0.6  | GCAAAGGAGUUGACAUU      | -10.6774 |
| HIST1H2AG | A549     | 0.92 | CCCAACAUUCAGGCCGUGCUA  | -10.779  |
| HIST1H2AG | A549     | 0.74 | AGGCCAAGACUCGCUCUUCUA  | -9.69221 |
| XRCC5     | A549     | 0.89 | CCUCAUAACAGCAUAACUUA   | -11.3388 |
| XRCC5     | A549     | 0.57 | CGCUUUAACAACUUCUGAAA   | -8.40831 |
| XRCC5     | A549     | 0.63 | UGAAGAUGGACCUACAGCUAA  | -11.9598 |
| RAN       | MCF7     | 0.93 | GCACAGUAUGAGCAGCAUUA   | -12.0797 |
| RAN       | MCF7     | 0.89 | ACGUCAUUUGACUGGUGAAU   | -10.1599 |
| RAN       | MCF7     | 0.87 | GACCCUAACUUGGAAUUGUU   | -10.5956 |
| RAN       | MCF7     | 0.62 | CAGUUCAAACUUGAUUGGUU   | -10.0299 |
| RAN       | MCF7     | 0.56 | GUGGAUUAUUAAGGACAGGAAA | -10.5081 |

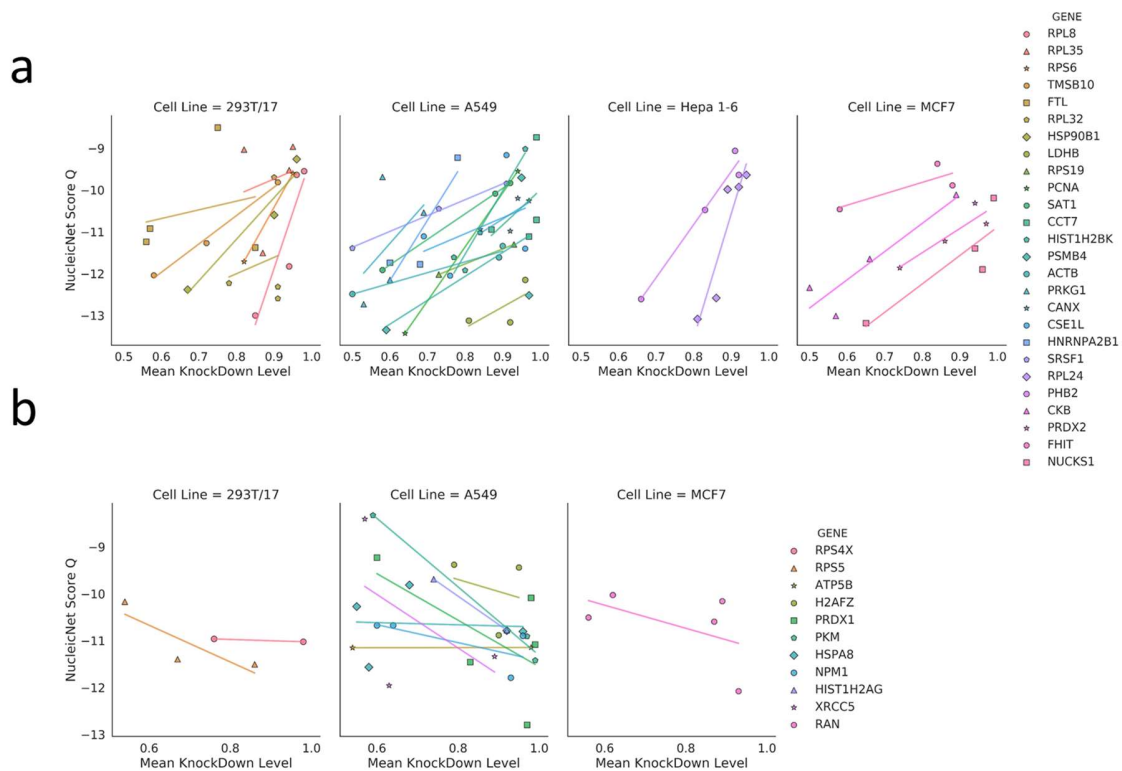

**Supplementary Figure 9 Correlation between NucleicNet Score Q and in vivo knockdown level. (a)**

Positive correlation (b) Negative correlation.

### Supplementary Discussion

We compare some alternatives to the ResNet architecture in NucleicNet. In our preliminary study, we had compared NucleicNet on the same dataset with a collection of shallow machine learning methods, including Support Vector Machine (SVM), Random Forest (RF) and K-Nearest Neighbor (KNN), as well as other deep learning models of different architectures (e.g. ‘FCNet’, a model composed of multiple fully-connected neural network layers and ‘CNN\_1D’, a model which convolves across the whole feature vector without considering the spatial information). We find that on the grid level prediction, the proposed model, NucleicNet, outperform all the shallow methods as well as other deep learning architectures under the same experimental setting. (Supplementary Table 6)

Hierarchical classification had been employed in NucleicNet to mitigate data imbalance issues. In our preliminary study, without considering a hierarchical classification scheme, good performance can still be achieved in larger classes e.g. Phosphate and Ribose; however, for smaller classes e.g. Guanine and Cytosine, the performance is unacceptable. (Supplementary Table 7) Therefore, a hierarchical strategy or other learning strategies specialised in handling data imbalance need to be employed. As a result, other techniques, e.g. MAX-AUC (Wang, S., Sun, S. & Xu, J. AUC-Maximized Deep Convolutional Neural Fields for Protein Sequence Labeling. in *Machine Learning and Knowledge Discovery in Databases* (eds. Frasconi, P., Landwehr, N., Manco, G. & Vreeken, J.) 1–16 (Springer International Publishing, 2016).) and ensemble learning with data sampling (Van Hulse, J., Khoshgoftaar, T. M. & Napolitano, A. Experimental Perspectives on Learning from Imbalanced Data. in *Proceedings of the 24th International Conference on Machine Learning* 935–942 (ACM, 2007). doi:10.1145/1273496.1273614 and Schmidhuber, J. Deep learning in neural networks: An overview. *Neural Networks* 61, 85–117 (2015)), have been tested. The MAX-AUC method can directly maximize the empirical Area Under the ROC Curve (AUC), which is an unbiased measurement for imbalanced data. (See ‘NucleicNet\_auc’ in Supplementary Table 6) For Ensemble Learning with data sampling, we combine the prediction power of a 20-member ensemble of NucleicNet, with the help of data sampling to further cope with the data imbalance issue. (See ‘NucleicNet\_en’ in Supplementary Table 6) Their performances are shown in Supplementary Table 6. Both methods can achieve reasonable performance compared to the original version of NucleicNet (See ‘NucleicNet’ in Supplementary Table 6). However, ‘NucleicNet\_auc’ encountered overfitting problem, so the latter did not surpass the original version of NucleicNet in performance. For ‘NucleicNet\_en’, computational resource and running time has been traded-off for a larger performance gain, especially on level 1 prediction. However, from the perspectives of users, the original version of NucleicNet, which has the best single-model performance, should be of the best practical interest.

**Supplementary Table 6 Performance comparison of Alternatives to NucleicNet.** We evaluate different algorithms on the same dataset with three-fold cross-validation. “NucleicNet” is the typical model reported in the main text. “NucleicNet\_en” is an ensemble classifier combining 20 NucleicNets. “NucleicNet\_auc” represents the typical model with AUROC as the objective function. “FCNet” is a fully-connect deep neural network model, without convolutional layers. “CNN\_1D” uses 1D convolutional layers to convolve the feature vector without considering the shell information. For shallow methods, Support Vector Machine “SVM”, Random Forest “RF” and K-Nearest Neighbor “KNN” were attempted. Level 1 prediction refers to prediction of “Non-Site”, “Phosphate”, “Ribose” and “Base”; level 2 predictions refers to prediction of the four bases.

| Level 1 Prediction |          |       |                   |                |                  |                  |       |
|--------------------|----------|-------|-------------------|----------------|------------------|------------------|-------|
|                    | Accuracy | Kappa | Precision (macro) | Recall (macro) | F1-score (macro) | F1-score (micro) | AUROC |
| NucleicNet_en      | 0.766    | 0.681 | 0.736             | 0.730          | 0.766            | 0.718            | 0.922 |
| NucleicNet         | 0.726    | 0.626 | 0.699             | 0.700          | 0.726            | 0.692            | 0.912 |
| NucleicNet_auc     | 0.711    | 0.602 | 0.703             | 0.671          | 0.711            | 0.670            | 0.902 |
| FCNet              | 0.705    | 0.589 | 0.679             | 0.662          | 0.705            | 0.664            | 0.905 |
| CNN_1D             | 0.709    | 0.600 | 0.675             | 0.676          | 0.709            | 0.672            | 0.903 |
| SVM                | 0.661    | 0.531 | 0.617             | 0.617          | 0.661            | 0.613            | 0.848 |
| RF                 | 0.695    | 0.576 | 0.668             | 0.615          | 0.695            | 0.568            | 0.892 |
| KNN                | 0.649    | 0.501 | 0.663             | 0.598          | 0.649            | 0.603            | 0.790 |

| Level 2 Prediction |          |       |                   |                |                  |                  |       |
|--------------------|----------|-------|-------------------|----------------|------------------|------------------|-------|
|                    | Accuracy | Kappa | Precision (macro) | Recall (macro) | F1-score (macro) | F1-score (micro) | AUROC |
| NucleicNet_en      | 0.451    | 0.232 | 0.424             | 0.411          | 0.451            | 0.408            | 0.696 |
| NucleicNet         | 0.445    | 0.225 | 0.427             | 0.415          | 0.445            | 0.404            | 0.673 |
| NucleicNet_auc     | 0.409    | 0.171 | 0.377             | 0.364          | 0.409            | 0.354            | 0.632 |
| FCNet              | 0.424    | 0.187 | 0.403             | 0.384          | 0.424            | 0.379            | 0.645 |
| CNN_1D             | 0.396    | 0.157 | 0.355             | 0.354          | 0.396            | 0.348            | 0.629 |
| SVM                | 0.366    | 0.119 | 0.330             | 0.330          | 0.366            | 0.323            | 0.586 |
| RF                 | 0.381    | 0.076 | 0.368             | 0.298          | 0.381            | 0.242            | 0.614 |
| KNN                | 0.438    | 0.228 | 0.419             | 0.413          | 0.438            | 0.402            | 0.629 |

**Supplementary Table 7 Effect of Hierarchical Training Strategy.** Performance of predicting all the seven classes directly with and without considering hierarchies in labels. On some small classes, the performance is unacceptable.

| Metrics                         | NonSite | Phosphate | Ribose | Adenine | Guanine | Uracil | Cytosine |
|---------------------------------|---------|-----------|--------|---------|---------|--------|----------|
| F1-score (macro) w/ Hierarchy   | 0.90    | 0.70      | 0.63   | 0.47    | 0.38    | 0.48   | 0.32     |
| F1-score (macro) w/o Hierarchy  | 0.88    | 0.63      | 0.55   | 0.17    | 0.04    | 0.13   | 0.00     |
| Recall (macro) w/ Hierarchy     | 0.88    | 0.82      | 0.63   | 0.46    | 0.38    | 0.45   | 0.37     |
| Recall (macro) w/o Hierarchy    | 0.90    | 0.69      | 0.53   | 0.24    | 0.03    | 0.12   | 0.00     |
| Precision (macro) w/ Hierarchy  | 0.92    | 0.61      | 0.63   | 0.48    | 0.38    | 0.51   | 0.29     |
| Precision (macro) w/o Hierarchy | 0.87    | 0.58      | 0.57   | 0.13    | 0.07    | 0.14   | 0.09     |
